# Supplementary material for: Optimum plant density for crowding stress tolerant processing sweet corn
Source: PLoS One. 2019 Sep 26;14(9):e0223107. doi: 10.1371/journal.pone.0223107 (PMC6762085; doi:10.1371/journal.pone.0223107)
Supplement: S1 File — (XLSX) [file pone.0223107.s002.xlsx]

## Sheet: compiled data
site-year	Year	State	Plot #	Data type	Actual plant population/ha	Ear number per plant	Ear number per ha	Ear Mass per plant	Green Ear mass	Green Ear mass	Ave. Ear Length	Ave. Filled Ear Lenth	% Filled ear Length	Kernel Moisture	recovery	moist-corrected kernel mass	kernel mass per plant	case production	Contract cost	Gross return	Gross profit Margin	Seed Cost	Recovery
					#/ha	no./plant	no/ha	kg/plant	Mt/ha	US ton/ha	cm	cm	%	%	%	Mt/ha	g/plant	cases/ha	$/ha	$/ha	$/ha	$/ha	cases/US ton
PL_Y13	2013	WI	1A	EXP	46284.6	1.39535	64583.2	1.28837	29.3399	32.2739	.	.	.	76.1172	42.21	11.2239	242.498	1830.98	2405.87	17394.3	14787.6	200.875	56.7326
PL_Y13	2013	WI	1B	EXP	41979.1	1.82051	76423.5	1.66359	34.959	38.4549	20.26	18.02	88.9437	76.9792	39.7658	12.5991	300.128	2055.32	2866.64	19525.5	16476.7	182.189	53.4475
PL_Y13	2013	WI	2A	EXP	62430.4	1.10345	68888.7	0.991724	30.5965	33.6562	19.48	19.48	100	76.3718	44.7288	12.4031	198.671	2023.34	2508.91	19221.8	16441.9	270.948	60.1181
PL_Y13	2013	WI	2B	EXP	61354	1.08772	66736	1.00281	30.3831	33.4214	20.12	20	99	76.8693	39.0781	10.7606	175.385	1755.4	2491.42	16676.3	13918.6	266.277	52.5232
PL_Y13	2013	WI	3A	EXP	53819.3	1.5	80729	1.2744	34.2714	37.6985	20.08	17.86	88.9442	78.9742	36.2201	11.25	209.033	1835.24	2810.26	17434.7	14390.9	233.576	48.6819
PL_Y13	2013	WI	3B	EXP	51666.6	1.4375	74270.7	1.30458	33.6194	36.9813	19.24	18.82	97.817	76.5417	40.6204	12.3767	239.549	2019.04	2756.79	19180.8	16199.8	224.233	54.5961
PL_Y13	2013	WI	4A	EXP	59201.3	1.38182	81805.4	1.19382	35.4213	38.9634	20.38	18.58	91.1678	76.8762	40.5161	13.0066	219.701	2121.79	2904.55	20157	16995.5	256.933	54.4559
PL_Y13	2013	WI	4B	EXP	61354	1.19298	73194.3	1.09193	33.3942	36.7336	20.3	20.16	99.3103	78.3822	38.3957	11.6205	189.4	1895.67	2738.32	18008.9	15004.3	266.277	51.606
PL_Y13	2013	WI	5A	EXP	65659.6	1.08197	71041.5	1.03541	33.9395	37.3334	20.42	20.24	99.1185	76.1695	44.9292	13.8199	210.478	2254.47	2783.04	21417.5	18349.5	284.963	60.3874
PL_Y13	2013	WI	5B	EXP	64583.2	1.11667	72117.9	0.978333	31.2959	34.4255	19.44	19.08	98.1481	76.7816	40.774	11.5649	179.07	1886.61	2566.27	17922.8	15076.2	280.291	54.8025
PL_Y13	2013	WI	6A	EXP	78576.2	0.958904	75347.1	0.815068	31.7701	34.9471	19.76	19.76	100	76.3771	43.6928	12.5805	160.106	2052.29	2605.15	19496.7	16550.6	341.021	58.7255
PL_Y13	2013	WI	6B	EXP	88263.7	0.963415	85034.5	0.766341	33.7498	37.1248	20.24	19.66	97.1344	76.2248	41.3	12.63	143.09	2061	2767.48	19579.5	16429	383.064	55.5155
PL_Y13	2013	WI	7A	EXP	79652.6	0.972973	77499.8	0.811081	32.0783	35.2862	19.88	19.36	97.3843	76.74	45.121	13.1178	164.687	2139.93	2630.42	20329.4	17353.2	345.692	60.6451
PL_Y13	2013	WI	7B	EXP	93645.6	0.931034	87187.3	0.667816	30.9403	34.0343	18.16	17.44	96.0352	77.8533	39.9254	11.1955	119.552	1826.35	2537.1	17350.3	14406.8	406.422	53.662
PL_Y13	2013	WI	8A	EXP	83958.2	0.897436	75347.1	0.764103	31.8294	35.0123	19.64	19.16	97.556	77.5112	42.0229	12.1223	144.385	1977.53	2610.01	18786.6	15812.2	364.378	56.4811
PL_Y13	2013	WI	8B	EXP	89340.1	0.939759	83958.2	0.783614	35.0538	38.5592	19.98	19.76	98.8989	76.7047	40.5717	12.8893	144.272	2102.66	2874.41	19975.2	16713.1	387.736	54.5306
PL_Y13	2013	WI	9A	EXP	63506.8	1.0339	65659.6	0.922034	28.7472	31.6219	20.26	20.02	98.8154	76.2871	43.1809	11.2501	177.148	1835.26	2357.27	17434.9	14802.1	275.62	58.0375
PL_Y13	2013	WI	9B	EXP	66736	1.09677	73194.3	0.975806	32.3628	35.5991	20.6	20.56	99.8058	76.3665	43.8438	12.8595	192.693	2097.8	2653.75	19929.1	16985.7	289.634	58.9285
PL_Y13	2013	WI	10A	EXP	68888.7	1.07812	74270.7	0.9125	31.1181	34.2299	19.62	19.38	98.7768	76.9592	42.8752	12.0918	175.526	1972.56	2551.68	18739.3	15888.6	298.977	57.6267
PL_Y13	2013	WI	10B	EXP	69965.1	0.984615	68888.7	0.897538	31.0825	34.1908	20.34	20.32	99.9017	77.4313	40.6465	11.4501	163.655	1867.88	2548.77	17744.9	14892.5	303.649	54.6312
PL_Y13	2013	WI	11A	GRW	54895.7	1.31373	72117.9	1.19765	32.7066	35.9773	20.14	20.14	100	76.5323	43.5815	12.9184	235.326	2107.4	2681.94	20020.3	17100.2	238.247	58.576
PL_Y13	2013	WI	11B	GRW	59201.3	1.01818	60277.7	0.975636	28.3086	31.1394	20.3	20.22	99.6059	78.5986	41.8874	10.7466	181.527	1753.12	2321.3	16654.6	14076.4	256.933	56.299
PL_Y13	2013	WI	11C	GRW	58124.9	1.37037	79652.6	1.13889	32.9556	36.2511	19.9	18.8	94.4724	80.7396	37.252	11.1263	191.42	1815.05	2702.36	17243	14288.4	252.262	50.0688
MD_Y13	2013	IL	1A	EXP	62430.4	0.931034	58124.9	0.76069	22.6658	24.9324	18.5	16.9	91.3514	76.4618	39.7305	8.16143	130.728	1331.39	1858.6	12648.2	10518.7	270.948	53.4
MD_Y13	2013	IL	1B	EXP	64583.2	0.983051	63488.6	0.747797	26.1511	28.7662	17.1	16	93.5673	76.9492	35.1672	8.33485	129.056	1359.68	2144.39	12917	10492.3	280.291	47.2667
MD_Y13	2013	IL	2A	EXP	64583.2	0.912281	58918	0.714737	24.1476	26.5624	17.2	15.8	91.8605	76.8016	34.8656	7.63032	118.147	1244.75	1980.11	11825.1	9564.73	280.291	46.8614
MD_Y13	2013	IL	2B	EXP	75347.1	0.938462	70710.3	0.726154	27.9767	30.7743	18.2	16	87.9121	76.6347	36.3309	9.21176	122.258	1502.73	2294.09	14276	11654.9	327.006	48.8308
MD_Y13	2013	IL	3A	EXP	68888.7	0.938462	64649.4	0.681231	26.2459	28.8705	18.6	16.7	89.7849	76.1219	37.1145	8.82828	128.153	1440.18	2152.16	13681.7	11230.5	298.977	49.884
MD_Y13	2013	IL	3B	EXP	86110.9	0.894737	77046.6	0.614211	27.6684	30.4353	17.5	16.2	92.5714	77.49	34.1061	8.55237	99.3181	1395.17	2268.81	13254.1	10611.6	373.721	45.8404
MD_Y13	2013	IL	4A	EXP	60277.7	0.964912	58162.6	0.773684	26.1392	28.7531	19.1	18.3	95.8115	76.567	37.41	8.86238	147.026	1445.74	2143.42	13734.5	11329.5	261.605	50.2811
MD_Y13	2013	IL	4B	EXP	68888.7	0.983871	67777.6	0.73871	27.1468	29.8615	18	17.1	95	77.1923	35.6703	8.77601	127.394	1431.65	2226.04	13600.7	11075.6	298.977	47.9429
MD_Y13	2013	IL	5A	EXP	88263.7	0.883721	78000.5	0.581163	29.6244	32.5869	17.6	15.3	86.9318	76.9246	36.5813	9.82155	111.275	1602.21	2429.2	15221	12408.7	383.064	49.1674
MD_Y13	2013	IL	5B	EXP	105486	0.915789	96602.9	0.486105	27.3721	30.1093	16.5	13.2	80	77.399	34.2439	8.49496	80.5317	1385.8	2244.51	13165.1	10462.8	457.809	46.0257
MD_Y13	2013	IL	6A	EXP	49513.8	1.04444	51714.4	0.884444	23.5905	25.9495	18.6	16.2	87.0968	77.3945	36.0446	7.70633	155.64	1257.15	1934.42	11942.9	9793.61	214.89	48.4459
MD_Y13	2013	IL	6B	EXP	55972.1	1.16327	65110.4	0.906122	26.317	28.9487	17.5	16	91.4286	76.5217	36.4338	8.68983	155.253	1417.59	2158	13467.1	11066.2	242.919	48.969
MD_Y13	2013	IL	7A	EXP	49513.8	0.938776	46482.3	0.802041	23.2941	25.6235	18.5	17.6	95.1351	77.3345	38.3004	8.08576	163.303	1319.05	1910.12	12530.9	10405.9	214.89	51.4779
MD_Y13	2013	IL	7B	EXP	58124.9	0.925926	53819.3	0.772963	24.7404	27.2144	18.8	17.1	90.9574	79.4741	32.8582	7.36751	126.753	1201.88	2028.71	11417.8	9136.86	252.262	44.1633
MD_Y13	2013	IL	8A	EXP	79652.6	1	79652.6	0.685135	30.0512	33.0563	18.3	16.3	89.071	76.8116	37.4891	10.2103	128.185	1665.63	2464.2	15823.4	13013.5	345.692	50.3875
MD_Y13	2013	IL	8B	EXP	94722	0.952381	90211.5	0.590238	29.3873	32.3261	17.4	15.1	86.7816	78.0288	35.3774	9.42229	99.4731	1537.08	2409.76	14602.2	11781.4	411.094	47.5492
MD_Y13	2013	IL	9A	EXP	77499.8	0.931507	72191.6	0.655068	28.3441	31.1786	18.4	16.9	91.8478	76.7716	38.5319	9.89817	127.719	1614.71	2324.22	15339.7	12679.2	336.349	51.7891
MD_Y13	2013	IL	9B	EXP	88263.7	0.870588	76841.3	0.570824	28.7591	31.635	18.4	15.9	86.413	76.3218	38.576	10.0545	113.915	1640.22	2358.24	15582.1	12840.8	383.064	51.8483
MD_Y13	2013	IL	10A	EXP	68888.7	0.969231	66769.1	0.757231	29.174	32.0914	17.9	16.2	90.5028	77.3323	37.9906	10.0448	145.812	1638.63	2392.27	15567	12875.8	298.977	51.0615
MD_Y13	2013	IL	10B	EXP	66736	0.953125	63607.7	0.741563	28.1308	30.9438	18.1	16	88.3978	77.4145	35.7829	9.12278	136.7	1488.22	2306.72	14138.1	11541.7	289.634	48.0942
MD_Y13	2013	IL	11A	GRW	66736	0.951613	63506.8	0.729032	26.7912	29.4703	18.3	17.5	95.6284	77.1314	36.5038	8.86341	132.813	1445.91	2196.88	13736.1	11249.6	289.634	49.0632
MD_Y13	2013	IL	11B	GRW	51666.6	1.07407	55493.7	0.790741	25.3094	27.8403	17.5	16	91.4286	78.1109	32.7895	7.5212	145.572	1226.95	2075.37	11656	9356.41	224.233	44.0709
MD_Y13	2013	IL	11C	GRW	64583.2	0.892308	57628.1	0.648923	25.0012	27.5013	18.2	16.8	92.3077	77.8311	34.0167	7.70766	119.345	1257.37	2050.1	11945	9614.6	280.291	45.7203
FF_Y14	2014	IL	1A	EXP	103253	0.916667	94648.9	0.288854	29.8252	32.8077	18.44	16.7	90.564	78.9667	42.3881	11.0796	107.305	1807.43	2445.66	17170.6	14276.8	448.119	55.0918
FF_Y14	2014	IL	1B	EXP	106480	0.878788	93573.3	0.273333	29.1045	32.015	18.54	16.46	88.781	78.6776	43.5157	11.252	105.673	1835.57	2386.57	17437.9	14589.2	462.123	57.3346
FF_Y14	2014	IL	2A	EXP	89271.1	0.939759	83893.3	0.32747	29.2336	32.157	18.82	17.96	95.4304	78.1782	41.3242	10.9841	123.042	1791.87	2397.16	17022.7	14238.1	387.437	55.7225
FF_Y14	2014	IL	2B	EXP	82817.8	0.948052	78515.6	0.331688	27.4697	30.2167	19.3	18.46	95.6477	77.775	44.8566	11.4107	137.78	1861.45	2252.51	17683.7	15071.8	359.429	61.6033
FF_Y14	2014	IL	3A	EXP	60231.1	1.03571	62382.2	0.383929	23.1244	25.4369	19.74	18.38	93.1104	77.0754	43.0523	9.50952	157.884	1551.31	1896.2	14737.4	12579.8	261.403	60.9866
FF_Y14	2014	IL	3B	EXP	70986.7	0.939394	66684.4	0.350303	24.8668	27.3535	19.36	18	92.9752	78.4053	43.6736	9.77185	137.658	1594.1	2039.08	15144	12796.8	308.082	58.2778
FF_Y14	2014	IL	4A	EXP	41946.7	1.38462	58080	0.521795	21.8876	24.0763	19.5	18.96	97.2308	78.522	39.4238	7.72216	184.095	1259.73	1794.78	11967.5	9990.63	182.049	52.3225
FF_Y14	2014	IL	4B	EXP	41946.7	1.10256	46248.9	0.426154	17.8757	19.6633	19.48	18.4	94.4559	78.3563	41.1024	6.62601	157.963	1080.92	1465.81	10268.7	8620.84	182.049	54.9712
FF_Y14	2014	IL	5A	EXP	68835.6	1.04688	72062.2	0.374375	25.7703	28.3473	18.2	17.42	95.7143	78.023	42.1392	9.94404	144.461	1622.19	2113.17	15410.8	12998.9	298.746	57.2256
FF_Y14	2014	IL	5B	EXP	65608.9	1.09836	72062.2	0.39623	25.9962	28.5958	19.52	18.46	94.5697	78.5422	41.5635	9.66041	147.242	1575.92	2131.69	14971.3	12554.8	284.743	55.1103
FF_Y14	2014	IL	6A	EXP	96800	0.844444	81742.2	0.265222	25.6735	28.2409	18.34	16.66	90.8397	78.4041	42.8271	9.89383	102.209	1614	2105.23	15333	12807.7	420.112	57.1513
FF_Y14	2014	IL	6B	EXP	86044.4	0.9875	84968.9	0.326875	28.1258	30.9384	17.94	15.66	87.291	78.7656	38.8364	9.66432	112.318	1576.56	2306.31	14977.3	12297.6	373.433	50.9581
FF_Y14	2014	IL	7A	EXP	79591.1	1.02703	81742.2	0.349459	27.8139	30.5953	18.42	17.52	95.114	78.738	41.9246	10.3306	129.795	1685.25	2280.74	16009.8	13383.7	345.425	55.0819
FF_Y14	2014	IL	7B	EXP	77440	0.972222	75288.9	0.344722	26.6953	29.3648	18.36	16.62	90.5229	79.2451	41.5198	9.58515	123.775	1563.65	2189.01	14854.6	12329.5	336.09	53.249
FF_Y14	2014	IL	8A	EXP	98951.1	1.01087	100027	0.29337	29.0292	31.9322	16.76	15.54	92.7208	79.53	39.1502	9.6934	97.9615	1581.31	2380.4	15022.4	12212.6	429.448	49.5208
FF_Y14	2014	IL	8B	EXP	101102	0.882979	89271.1	0.248723	25.1465	27.6611	17.8	16.56	93.0337	80.0414	42.497	8.88696	87.9008	1449.75	2062.01	13772.6	11271.8	438.784	52.411
FF_Y14	2014	IL	9A	EXP	59155.6	1.05455	62382.2	0.390364	23.0922	25.4014	18.72	17.6	94.0171	77.9899	43.3235	9.17487	155.097	1496.72	1893.56	14218.8	12068.5	256.735	58.9226
FF_Y14	2014	IL	9B	EXP	74213.3	0.913043	67760	0.332754	24.6948	27.1642	18.3	17.12	93.5519	78.3925	41.4721	9.2205	124.243	1504.16	2024.97	14289.5	11942.5	322.086	55.3728
FF_Y14	2014	IL	10A	EXP	48400	1.08889	52702.2	0.441111	21.3498	23.4848	19.22	18.48	96.1498	79.0507	41.7344	7.7776	160.694	1268.78	1750.68	12053.4	10092.6	210.056	54.0255
FF_Y14	2014	IL	10B	EXP	64533.3	0.916667	59155.6	0.346167	22.3393	24.5732	19.3	18.08	93.6788	78.134	40.3174	8.20578	127.156	1338.63	1831.82	12717	10605.1	280.075	54.475
VC_Y14	2014	IL	1A	EXP	49475.6	1.02174	50551.1	0.417391	20.6507	22.7157	19.3	17.96	93.057	77.8438	39.1957	7.47233	151.031	1218.98	1693.35	11580.3	9672.2	214.724	53.6622
VC_Y14	2014	IL	1B	EXP	54853.3	0.901961	49475.6	0.399216	21.8983	24.0881	18.94	17	89.7571	77.4328	44.2424	9.10994	166.078	1486.12	1795.66	14118.2	12084.5	238.063	61.6953
VC_Y14	2014	IL	2A	EXP	94648.9	0.897727	84968.9	0.260114	24.6195	27.0814	17.68	15.48	87.5566	78.1671	42.1186	9.43307	99.6638	1538.84	2018.8	14618.9	12189.4	410.776	56.8226
VC_Y14	2014	IL	2B	EXP	93573.3	0.83908	78515.6	0.22092	20.6722	22.7394	18.2	17	93.4066	78.691	41.4741	7.61228	81.351	1241.81	1695.12	11797.2	9695.95	406.108	54.6104
VC_Y14	2014	IL	3A	EXP	69911.1	0.876923	61306.7	0.354308	24.77	27.247	18.86	17.4	92.2587	77.6786	44.7062	10.2992	147.319	1680.13	2031.14	15961.2	13626.7	303.414	61.6629
VC_Y14	2014	IL	3B	EXP	65608.9	1	65608.9	0.420492	27.588	30.3468	19.84	18.6	93.75	76.9182	45.5211	12.0779	184.089	1970.29	2262.22	18717.8	16170.8	284.743	64.9259
VC_Y14	2014	IL	4A	EXP	78515.6	0.945205	74213.3	0.348356	27.3514	30.0865	18.36	16.86	91.8301	77.1269	44.9238	11.7103	149.147	1910.33	2242.81	18148.2	15564.6	340.758	63.4947
VC_Y14	2014	IL	4B	EXP	79591.1	0.891892	70986.7	0.316081	25.1572	27.673	16.7	15.42	92.3353	77.5606	46.9389	11.0407	138.717	1801.09	2062.89	17110.3	14702	345.425	65.0848
VC_Y14	2014	IL	5A	EXP	97875.6	0.868132	84968.9	0.25011	24.4796	26.9276	17.7	16.32	92.2034	78.2187	42.6411	9.47341	96.7904	1545.42	2007.33	14681.5	12249.4	424.78	57.3916
VC_Y14	2014	IL	5B	EXP	91422.2	0.894118	81742.2	0.246706	22.5544	24.8098	18.88	16.78	88.8771	78.7226	41.1003	8.21834	89.8944	1340.68	1849.46	12736.4	10490.2	396.772	54.0381
VC_Y14	2014	IL	6A	EXP	59155.6	1.01818	60231.1	0.383273	22.6727	24.94	18.52	16.82	90.8207	77.7367	46.0299	9.68103	163.654	1579.29	1859.16	15003.2	12887.3	256.735	63.3235
VC_Y14	2014	IL	6B	EXP	55928.9	0.980769	54853.3	0.389038	21.7585	23.9343	18.92	17.8	94.0803	77.4318	42.5568	8.70731	155.685	1420.44	1784.2	13494.2	11467.3	242.731	59.3474
VC_Y14	2014	IL	7A	EXP	101102	0.62766	63457.8	0.15266	15.4342	16.9776	17.32	12.86	74.2494	79.7269	39.0549	5.09177	50.3626	830.632	1265.61	7891	6186.61	438.784	48.925
VC_Y14	2014	IL	7B	EXP	105404	0.857143	90346.7	0.224388	23.6515	26.0166	18.4	14.46	78.587	79.9318	42.7856	8.46159	80.2774	1380.36	1939.42	13113.4	10716.5	457.455	53.0568
VC_Y14	2014	IL	8A	EXP	68835.6	0.96875	66684.4	0.348125	23.9634	26.3597	17.74	15.9	89.628	78.4932	44.4963	9.55513	138.811	1558.75	1965	14808.1	12544.4	298.746	59.1337
VC_Y14	2014	IL	8B	EXP	63457.8	0.915254	58080	0.340678	21.6187	23.7805	19.3	18.4	95.3368	77.962	43.3014	8.59592	135.459	1402.27	1772.73	13321.6	11273.4	275.407	58.9672
VC_Y14	2014	IL	9A	EXP	80666.7	0.92	74213.3	0.304533	24.5657	27.0223	18.32	16.02	87.4454	77.757	45.5137	10.3622	128.457	1690.41	2014.39	16058.9	13694.4	350.093	62.5563
VC_Y14	2014	IL	9B	EXP	82817.8	0.987013	81742.2	0.35026	29.0077	31.9085	18.62	16.9	90.7626	77.4264	44.9094	12.2529	147.951	1998.85	2378.63	18989.1	16251	359.429	62.6431
VC_Y14	2014	IL	10A	EXP	90346.7	0.97619	88195.6	0.268929	24.2968	26.7265	18.3	15.2	83.0601	77.2905	45.1136	10.3717	114.799	1691.96	1992.34	16073.7	13689.2	392.105	63.3067
VC_Y14	2014	IL	10B	EXP	87120	0.950617	82817.8	0.284691	24.8023	27.2825	18.6	15.84	85.1613	78.053	44.2051	10.026	115.083	1635.57	2033.79	15537.9	13126	378.101	59.9491
WYN_Y14	2014	WI	1A	EXP	119387	0.810811	96800	0.234505	27.9967	30.7964	18.44	16.84	91.3232	79.5772	47.1566	11.2345	94.1018	1832.71	2295.73	17410.7	14596.9	518.138	59.5105
WYN_Y14	2014	WI	1B	EXP	100027	0.88172	88195.6	0.285699	28.5775	31.4353	18.28	16.24	88.8403	78.3582	38.1561	9.83263	98.3001	1604.02	2343.36	15238.2	12460.7	434.116	51.0261
WYN_Y14	2014	WI	2A	EXP	47324.4	1.40909	66684.4	0.562727	26.6308	29.2938	20.92	20.34	97.2275	77.55	41.3917	10.311	217.879	1682.06	2183.72	15979.5	13590.4	205.388	57.4201
WYN_Y14	2014	WI	2B	EXP	41946.7	1.82051	76364.4	0.667692	28.0075	30.8082	19.9	17.08	85.8291	79.8108	40.9496	9.6479	230.004	1573.88	2296.61	14951.9	12473.2	182.049	51.0865
WYN_Y14	2014	WI	3A	EXP	86044.4	1	86044.4	0.347875	29.9327	32.926	19.12	17.54	91.7364	79.5935	43.0416	10.9545	127.312	1787.03	2454.48	16976.8	14148.9	373.433	54.2742
WYN_Y14	2014	WI	3B	EXP	87120	0.938272	81742.2	0.320741	27.9429	30.7372	19.6	18.98	96.8367	79.6502	43.002	10.1885	116.948	1662.07	2291.32	15789.6	13120.2	378.101	54.0734
WYN_Y14	2014	WI	4A	EXP	60231.1	1.10714	66684.4	0.470179	28.3194	31.1513	20.88	20.56	98.4674	77.5538	41.1669	10.9035	181.027	1778.71	2322.19	16897.7	14314.1	261.403	57.0989
WYN_Y14	2014	WI	4B	EXP	54853.3	1.27451	69911.1	0.491176	26.9427	29.6369	20.18	18.88	93.558	77.9695	41.9397	10.3724	189.093	1692.07	2209.3	16074.7	13627.3	238.063	57.0933
WYN_Y14	2014	WI	5A	EXP	70986.7	0.969697	68835.6	0.365455	25.9424	28.5366	19.2	18.02	93.8542	80.6388	41.9185	8.7728	123.584	1431.13	2127.28	13595.7	11160.3	308.082	50.1505
WYN_Y14	2014	WI	5B	EXP	76364.4	0.957746	73137.8	0.367746	28.0828	30.891	20.26	19.58	96.6436	78.0867	41.7472	10.7044	140.176	1746.24	2302.79	16589.3	13955	331.422	56.5289
WYN_Y14	2014	WI	6A	EXP	52702.2	1.10204	58080	0.470816	24.8131	27.2944	19.78	19.58	98.9889	77.1337	41.0444	9.7033	184.116	1582.92	2034.67	15037.7	12774.3	228.728	57.9944
WYN_Y14	2014	WI	6B	EXP	49475.6	1.17391	58080	0.44087	21.8123	23.9935	20.3	20.04	98.7192	78.5615	43.6858	8.51187	172.042	1388.56	1788.61	13191.3	11188	214.724	57.8724
WYN_Y14	2014	WI	7A	EXP	96800	0.944444	91422.2	0.293333	28.3947	31.2341	19.04	17.06	89.6008	80.5703	42.8656	9.8537	101.794	1607.45	2328.36	15270.8	12522.3	420.112	51.4647
WYN_Y14	2014	WI	7B	EXP	105404	0.959184	101102	0.303163	31.9548	35.1502	19.18	16.82	87.6955	80.3429	43.1059	11.2819	107.034	1840.44	2620.29	17484.1	14406.4	457.455	52.3591
WYN_Y14	2014	WI	8A	EXP	82817.8	0.974026	80666.7	0.364545	30.1908	33.2099	19.88	19.22	96.6801	77.8452	43.5223	12.1295	146.461	1978.72	2475.65	18797.8	15962.8	359.429	59.5821
WYN_Y14	2014	WI	8B	EXP	78515.6	0.958904	75288.9	0.35411	27.8031	30.5834	19.9	19.14	96.1809	78.114	43.965	11.1469	141.971	1818.42	2279.86	17275	14654.4	340.758	59.4578
WYN_Y14	2014	WI	9A	EXP	94648.9	0.954545	90346.7	0.314432	29.7606	32.7367	19.36	18.14	93.6983	80.6582	40.0236	9.59941	101.421	1565.97	2440.37	14876.7	12025.6	410.776	47.8354
WYN_Y14	2014	WI	9B	EXP	90346.7	0.952381	86044.4	0.305595	27.6095	30.3705	19.46	18.5	95.0668	79.8886	43.7204	10.1152	111.96	1650.11	2263.98	15676.1	13020	392.105	54.3328
WYN_Y14	2014	WI	10A	EXP	65608.9	1.03279	67760	0.428033	28.0828	30.891	19.82	19.04	96.0646	77.6409	43.0667	11.2674	171.736	1838.08	2302.79	17461.8	14874.2	284.743	59.5021
WYN_Y14	2014	WI	10B	EXP	62382.2	1.01724	63457.8	0.395345	24.6625	27.1287	20.08	19.68	98.008	78.1548	42.2926	9.49392	152.19	1548.76	2022.32	14713.3	12420.2	270.739	57.0894
WYN_Y14	2014	WI	111A	GRW	59155.6	1.01818	60231.1	0.455455	26.9427	29.6369	20.24	19.42	95.9486	76.884	41.853	10.861	183.6	1771.77	2209.3	16831.8	14365.8	256.735	59.7826
WYN_Y14	2014	WI	111B	GRW	60231.1	1.03571	62382.2	0.429286	25.8564	28.442	20.98	20.98	100	77.9399	43.3509	10.3029	171.057	1680.74	2120.22	15967	13585.4	261.403	59.0937
WYN_Y14	2014	WI	111C	GRW	58080	1.09259	63457.8	0.454444	26.3941	29.0335	19.64	15.74	80.1426	77.9581	42.0587	10.1953	175.539	1663.18	2164.32	15800.3	13383.9	252.067	57.2849
PMT_Y14	2014	WI	201A	EXP	70986.7	0.954545	67760	0.322121	22.8663	25.1529	18.64	16.94	90.8798	75.5856	42.264	9.8311	138.492	1603.77	1875.04	15235.8	13052.7	308.082	63.7606
PMT_Y14	2014	WI	201B	EXP	65608.9	0.967213	63457.8	0.32	20.9948	23.0943	18.1	16.58	91.6022	76.546	44.2107	9.07082	138.256	1479.74	1721.58	14057.5	12051.2	284.743	64.0738
PMT_Y14	2014	WI	202A	EXP	57004.4	0.981132	55928.9	0.382075	21.78	23.958	18.4	17.1	92.9348	76.5007	43.1343	9.19867	161.368	1500.6	1785.96	14255.7	12222.3	247.399	62.6345
PMT_Y14	2014	WI	202B	EXP	60231.1	0.928571	55928.9	0.358214	21.5756	23.7332	18.32	17	92.7948	76.4571	41.5066	8.78475	145.851	1433.07	1769.2	13614.2	11583.6	261.403	60.3827
PMT_Y14	2014	WI	203A	EXP	43022.2	1.2	51626.7	0.48575	20.898	22.9878	19.66	19.14	97.355	76.7537	42.6483	8.63278	200.659	1408.28	1713.64	13378.7	11478.3	186.716	61.2621
PMT_Y14	2014	WI	203B	EXP	39795.6	1.21622	48400	0.475135	18.9083	20.7991	19.2	19.06	99.2708	76.3681	39.5708	7.3674	185.131	1201.86	1550.48	11417.7	9694.47	172.713	57.7842
PMT_Y14	2014	WI	204A	EXP	78515.6	0.917808	72062.2	0.279178	21.9198	24.1118	17.76	15	84.4595	76.888	38.5597	8.13949	103.667	1327.81	1797.43	12614.2	10476	340.758	55.069
PMT_Y14	2014	WI	204B	EXP	80666.7	0.96	77440	0.279733	22.5652	24.8217	16.94	14.7	86.7769	77.4857	43.3584	9.17823	113.78	1497.26	1850.34	14224	12023.6	350.093	60.3208
PMT_Y14	2014	WI	205A	EXP	92497.8	0.686047	63457.8	0.170698	15.7892	17.3681	17.56	15.94	90.7745	78.8427	42.6446	5.9357	64.1713	968.304	1294.71	9198.89	7502.74	401.44	55.752
PMT_Y14	2014	WI	205B	EXP	96800	0.9	87120	0.238444	23.0814	25.3896	16.42	13.76	83.8002	77.5245	44.6226	9.64532	99.6418	1573.46	1892.68	14947.9	12635.1	420.112	61.9728
PMT_Y14	2014	WI	206A	EXP	75288.9	0.971429	73137.8	0.291429	21.9413	24.1355	17.96	16.1	89.6437	76.4712	42.5738	9.15788	121.637	1493.94	1799.19	14192.5	12066.5	326.754	61.8983
PMT_Y14	2014	WI	206B	EXP	76364.4	0.929577	70986.7	0.285352	21.7908	23.9698	17.8	15.94	89.5506	76.9066	44.0782	9.24215	121.027	1507.69	1786.84	14323.1	12204.8	331.422	62.8996
PMT_Y14	2014	WI	207A	EXP	60231.1	0.964286	58080	0.3225	19.4245	21.367	18.26	17.94	98.2475	78.2699	41.31	7.26535	120.625	1185.21	1592.81	11259.5	9405.3	261.403	55.4693
PMT_Y14	2014	WI	207B	EXP	59155.6	0.981818	58080	0.348364	20.6076	22.6684	18.36	17.48	95.207	76.1052	44.6242	9.1557	154.773	1493.59	1689.83	14189.1	12242.5	256.735	65.8886
PMT_Y14	2014	WI	208A	EXP	43022.2	1.025	44097.8	0.42075	18.1016	19.9118	18.88	18.56	98.3051	76.4521	44.5364	7.90994	183.857	1290.37	1484.33	12258.5	10587.4	186.716	64.8042
PMT_Y14	2014	WI	208B	EXP	45173.3	1	45173.3	0.414286	18.7147	20.5861	18.68	18.22	97.5375	76.2219	44.356	8.22431	182.061	1341.65	1534.6	12745.7	11015	196.052	65.1725
PMT_Y14	2014	WI	209A	EXP	93573.3	0.827586	77440	0.234023	21.8983	24.0881	17.7	15.9	89.8305	76.8865	43.3858	9.14983	97.7824	1492.63	1795.66	14180	11978.2	406.108	61.9654
PMT_Y14	2014	WI	209B	EXP	89271.1	0.951807	84968.9	0.258795	23.1029	25.4132	17.3	15.86	91.6763	77.3462	43.9327	9.58041	107.318	1562.87	1894.44	14847.3	12565.4	387.437	61.4984
PMT_Y14	2014	WI	210A	EXP	96800	0.677778	65608.9	0.170667	16.5205	18.1726	16.96	15.4	90.8019	80.4683	40.7297	5.476	56.5702	893.311	1354.68	8486.46	6711.66	420.112	49.1571
PMT_Y14	2014	WI	210B	EXP	103253	0.822917	84968.9	0.207083	21.382	23.5202	16.84	15.4	91.4489	78.8114	43.4836	8.20852	79.4989	1339.07	1753.33	12721.2	10519.8	448.119	56.9328
PMT_Y14	2014	WI	211A	GRW	58080	1.03704	60231.1	0.401481	23.318	25.6498	19.28	18.2	94.3983	75.7662	45.1569	10.6323	183.063	1734.47	1912.08	16477.4	14313.3	252.067	67.6209
PMT_Y14	2014	WI	211B	GRW	57004.4	1	57004.4	0.368491	21.0056	23.1062	18.78	17.8	94.7817	76.7418	42.7983	8.71219	152.833	1421.24	1722.46	13501.8	11531.9	247.399	61.509
PMT_Y14	2014	WI	211C	GRW	57004.4	1.01887	58080	0.385849	21.9951	24.1946	19.04	17.7	92.9622	76.1223	44.5419	9.74712	170.989	1590.07	1803.6	15105.7	13054.7	247.399	65.7199
OKR_Y14	2014	WI	201A	EXP	59155.6	0.945455	55928.9	0.325273	19.2417	21.1659	18.8	17.9	95.2128	75.5828	39.836	7.79835	131.828	1272.16	1577.82	12085.5	10251	256.735	60.1044
OKR_Y14	2014	WI	201B	EXP	59155.6	0.909091	53777.8	0.322909	19.1019	21.0121	17.4	16	91.954	75.7968	39.5267	7.61426	128.716	1242.13	1566.35	11800.2	9977.16	256.735	59.1152
OKR_Y14	2014	WI	202A	EXP	52702.2	0.979592	51626.7	0.345918	18.2307	20.0537	18.6	17.8	95.6989	74.3489	40.295	7.85143	148.977	1280.82	1494.91	12167.8	10444.2	228.728	63.8694
OKR_Y14	2014	WI	202B	EXP	47324.4	0.977273	46248.9	0.375455	17.7682	19.545	19	18.6	97.8947	77.3392	39.5132	6.62902	140.076	1081.41	1456.99	10273.4	8610.99	205.388	55.3291
OKR_Y14	2014	WI	203A	EXP	65608.9	0.967213	63457.8	0.309016	20.2742	22.3016	18.9	17	89.9471	74.9909	39.8214	8.41295	128.229	1372.42	1662.49	13038	11090.8	284.743	61.5391
OKR_Y14	2014	WI	203B	EXP	64533.3	0.933333	60231.1	0.314333	20.285	22.3135	18.4	17.2	93.4783	76.8131	38.9747	7.63816	118.36	1246.03	1663.37	11837.3	9893.83	280.075	55.842
OKR_Y14	2014	WI	204A	EXP	78515.6	0.90411	70986.7	0.268219	21.0594	23.1653	18.8	16.9	89.8936	77.3542	41.6159	8.26954	105.324	1349.03	1726.87	12815.8	10748.1	340.758	58.2348
OKR_Y14	2014	WI	204B	EXP	75288.9	0.942857	70986.7	0.289714	21.8123	23.9935	18	15.5	86.1111	77.981	38.4341	7.69136	102.158	1254.71	1788.61	11919.7	9804.37	326.754	52.2937
OKR_Y14	2014	WI	205A	EXP	78515.6	0.876712	68835.6	0.263014	20.6507	22.7157	17.8	15.5	87.0787	75.9465	39.9151	8.2611	105.216	1347.65	1693.35	12802.7	10768.6	340.758	59.3268
OKR_Y14	2014	WI	205B	EXP	77440	0.847222	65608.9	0.237778	18.4135	20.2549	17.9	15.5	86.5922	77.4323	39.7862	6.88883	88.957	1123.79	1509.91	10676	8830	336.09	55.4825
OKR_Y14	2014	WI	206A	EXP	61306.7	0.947368	58080	0.320877	19.6719	21.6391	18.4	16.5	89.6739	75.1905	37.8732	7.70169	125.626	1256.39	1613.1	11935.7	10056.6	266.071	58.0613
OKR_Y14	2014	WI	206B	EXP	64533.3	0.95	61306.7	0.307167	19.8225	21.8047	18.7	16.9	90.3743	76.2785	39.9264	7.82256	121.217	1276.11	1625.44	12123.1	10217.5	280.075	58.5245
OKR_Y14	2014	WI	207A	EXP	39795.6	1.05405	41946.7	0.388649	15.4665	17.0131	18.7	17.8	95.1872	77.0771	39.426	5.82416	146.352	950.107	1268.25	9026.02	7585.06	172.713	55.8455
OKR_Y14	2014	WI	207B	EXP	45173.3	1	45173.3	0.372143	16.8109	18.492	19.4	19	97.9381	76.9619	37.5632	6.06163	134.186	988.847	1378.5	9394.04	7819.49	196.052	53.4742
OKR_Y14	2014	WI	208A	EXP	86044.4	0.975	83893.3	0.26225	22.5652	24.8217	17.4	15.2	87.3563	78.3723	39.8431	8.10197	94.1603	1321.69	1850.34	12556.1	10332.3	373.433	53.2475
OKR_Y14	2014	WI	208B	EXP	86044.4	0.8625	74213.3	0.23875	20.5431	22.5974	17.8	14.9	83.7079	76.7352	40.7741	8.11968	94.3662	1324.58	1684.54	12583.5	10525.6	373.433	58.6165
OKR_Y14	2014	WI	209A	EXP	87120	0.802469	69911.1	0.201358	17.5423	19.2965	17.4	15.6	89.6552	78.7054	38.7573	6.03253	69.2439	984.1	1438.47	9348.95	7532.37	378.101	50.9987
OKR_Y14	2014	WI	209B	EXP	92497.8	0.825581	76364.4	0.217558	20.1236	22.136	16.4	14.6	89.0244	77.847	38.9995	7.24414	78.3169	1181.75	1650.14	11226.6	9175.06	401.44	53.3859
OKR_Y14	2014	WI	210A	EXP	102178	0.778947	79591.1	0.196	20.0268	22.0295	17.6	14.7	83.5227	77.9253	40.2258	7.40971	72.5179	1208.76	1642.2	11483.2	9397.59	443.452	54.8701
OKR_Y14	2014	WI	210B	EXP	98951.1	0.75	74213.3	0.186087	18.4135	20.2549	16.7	14.5	86.8263	77.9845	39.2403	6.62806	66.9832	1081.25	1509.91	10271.9	8332.52	429.448	53.3823
OKR_Y14	2014	WI	211A	GRW	57004.4	0.981132	55928.9	0.348679	19.8763	21.8639	18.3	17.7	96.7213	75.9221	41.0425	8.18421	143.571	1335.11	1629.85	12683.5	10806.3	247.399	61.0645
OKR_Y14	2014	WI	211B	GRW	55928.9	0.980769	54853.3	0.358654	20.0591	22.065	18.8	18.2	96.8085	74.9346	41.5316	8.7007	155.567	1419.36	1644.85	13484	11596.4	242.731	64.3264
OKR_Y14	2014	WI	211C	GRW	54853.3	1	54853.3	0.348824	19.1341	21.0475	18.7	17.6	94.1176	75.4808	41.6997	8.15149	148.605	1329.77	1569	12632.8	10825.8	238.063	63.1793
TYLR1_Y14	2014	IL	201A	EXP	37644.4	1.22857	46248.9	0.514286	19.36	21.296	19.66	16.04	81.587	76.502	36.6405	6.94522	184.495	1132.99	1587.52	10763.4	9012.49	163.377	53.2019
TYLR1_Y14	2014	IL	201B	EXP	38720	1.16667	45173.3	0.508611	19.6934	21.6628	20.24	19.46	96.1462	76.869	37.4158	7.10167	183.411	1158.51	1614.86	11005.8	9222.94	168.045	53.4793
TYLR1_Y14	2014	IL	202A	EXP	70986.7	0.909091	64533.3	0.323182	22.9416	25.2358	19.5	16.34	83.7949	79.551	32.091	6.27289	88.3671	1023.31	1881.21	9721.44	7532.15	308.082	40.55
TYLR1_Y14	2014	IL	202B	EXP	69911.1	0.969231	67760	0.335385	23.4471	25.7918	19.44	16.28	83.7449	77.709	32.8259	7.14866	102.254	1166.18	1922.66	11078.7	8852.6	303.414	45.215
TYLR1_Y14	2014	IL	203A	EXP	49475.6	1.1087	54853.3	0.453696	22.4468	24.6915	19.74	18.24	92.4012	78.1458	35.9895	7.35622	148.684	1200.04	1840.64	11400.3	9344.97	214.724	48.6011
TYLR1_Y14	2014	IL	203B	EXP	50551.1	1.02128	51626.7	0.411702	20.812	22.8932	18.86	17.16	90.9862	78.0283	36.4603	6.94683	137.422	1133.25	1706.58	10765.9	8839.91	219.392	49.5016
TYLR1_Y14	2014	IL	204A	EXP	65608.9	0.934426	61306.7	0.30082	19.7364	21.7101	19.62	17.34	88.3792	79.1722	36.5643	6.26266	95.4545	1021.64	1618.39	9705.59	7802.46	284.743	47.0584
TYLR1_Y14	2014	IL	204B	EXP	58080	0.962963	55928.9	0.337407	19.5966	21.5563	20.02	18.46	92.2078	78.7577	35.1898	6.10363	105.09	995.698	1606.92	9459.13	7600.14	252.067	46.1906
TYLR1_Y14	2014	IL	205A	EXP	90346.7	0.654762	59155.6	0.208333	18.8222	20.7044	18.94	17.66	93.2418	78.0705	34.9506	6.01094	66.5319	980.577	1543.42	9315.48	7379.96	392.105	47.3607
TYLR1_Y14	2014	IL	205B	EXP	88195.6	0.585366	51626.7	0.17378	15.3267	16.8593	18.32	16.74	91.3755	76.6138	37.0096	5.52726	62.6706	901.675	1256.79	8565.91	6926.35	382.769	53.4822
TYLR1_Y14	2014	IL	206A	EXP	43022.2	1.025	44097.8	0.45925	19.758	21.7338	20.12	19.42	96.5209	77.3185	35.9544	6.7136	156.05	1095.2	1620.15	10404.4	8597.57	186.716	50.3919
TYLR1_Y14	2014	IL	206B	EXP	38720	1.16667	45173.3	0.505556	19.5751	21.5326	19.64	19.3	98.2688	76.9004	39.119	7.37031	190.349	1202.33	1605.16	11422.2	9648.97	168.045	55.8378
TYLR1_Y14	2014	IL	207A	EXP	89271.1	0.686747	61306.7	0.223373	19.9408	21.9349	18.6	14.3	76.8817	79.4759	36.1	6.15606	68.9592	1004.25	1635.15	9540.39	7517.81	387.437	45.7833
TYLR1_Y14	2014	IL	207B	EXP	101102	0.691489	69911.1	0.206702	20.898	22.9878	19.08	17.06	89.413	77.0484	38.5372	7.70172	76.1776	1256.4	1713.64	11935.8	9783.36	438.784	54.6549
TYLR1_Y14	2014	IL	208A	EXP	54853.3	1	54853.3	0.397843	21.823	24.0053	19.8	18.6	93.9394	76.7933	36.6405	7.73175	140.953	1261.3	1789.49	11982.3	9954.76	238.063	52.5424
TYLR1_Y14	2014	IL	208B	EXP	57004.4	1.03774	59155.6	0.402453	22.9416	25.2358	19.9	18.54	93.1658	78.0757	37.2595	7.80861	136.983	1273.84	1881.21	12101.4	9972.83	247.399	50.4774
TYLR1_Y14	2014	IL	209A	EXP	79591.1	0.905405	72062.2	0.297162	23.6515	26.0166	19.12	17.56	91.841	77.8096	36.7203	8.03006	100.891	1309.96	1939.42	12444.6	10159.8	345.425	50.351
TYLR1_Y14	2014	IL	209B	EXP	82817.8	0.883117	73137.8	0.273506	22.6512	24.9163	18.16	16.66	91.7401	77.5468	36.8591	7.81091	94.3144	1274.21	1857.4	12105	9888.18	359.429	51.1396
TYLR1_Y14	2014	IL	210A	EXP	70986.7	0.909091	64533.3	0.315758	22.4146	24.656	19.26	17.92	93.0426	77.583	36.5921	7.661	107.922	1249.76	1838	11872.7	9726.6	308.082	50.6876
TYLR1_Y14	2014	IL	210B	EXP	68835.6	0.9375	64533.3	0.321562	22.1349	24.3484	18.56	17.8	95.9052	76.7618	39.1157	8.3834	121.789	1367.6	1815.06	12992.2	10878.4	298.746	56.168
TYLR1_Y14	2014	IL	211A	GRW	58080	1	58080	0.389074	22.5974	24.8572	19.68	19.04	96.748	76.5185	37.0172	8.18422	140.913	1335.11	1852.99	12683.5	10578.5	252.067	53.7113
TYLR1_Y14	2014	IL	211B	GRW	57004.4	0.981132	55928.9	0.35566	20.2742	22.3016	18.54	15.88	85.6526	77.3648	35.5293	6.79366	119.178	1108.26	1662.49	10528.5	8618.63	247.399	49.6943
TYLR1_Y14	2014	IL	211C	GRW	61306.7	0.894737	54853.3	0.347719	21.3175	23.4493	20.32	19.84	97.6378	77.1382	37.6723	7.64992	124.781	1247.95	1748.04	11855.5	9841.4	266.071	53.2191
TYLR2_Y14	2014	IL	201A	EXP	84968.9	0.886076	75288.9	0.282405	23.9956	26.3952	18.14	14.76	81.3671	76.8123	31.4844	7.2992	85.9044	1190.73	1967.64	11312	8975.56	368.765	45.1117
TYLR2_Y14	2014	IL	201B	EXP	79591.1	0.959459	76364.4	0.317432	25.2648	27.7913	19.8	16.94	85.5556	77.4986	36.0352	8.53575	107.245	1392.45	2071.71	13228.3	10811.2	345.425	50.104
TYLR2_Y14	2014	IL	202A	EXP	77440	0.944444	73137.8	0.328611	25.4476	27.9924	18.68	17.14	91.7559	76.6652	34.834	8.61874	111.296	1405.99	2086.71	13356.9	10934.1	336.09	50.2277
TYLR2_Y14	2014	IL	202B	EXP	76364.4	0.957746	73137.8	0.317606	24.2538	26.6792	18.98	16.54	87.1444	78.2483	35.8794	7.88692	103.28	1286.61	1988.81	12222.8	9902.57	331.422	48.2253
TYLR2_Y14	2014	IL	203A	EXP	47324.4	1.02273	48400	0.427955	20.2527	22.278	20.64	20.58	99.7093	76.0826	38.4408	7.75849	163.942	1265.66	1660.72	12023.8	10157.6	205.388	56.8121
TYLR2_Y14	2014	IL	203B	EXP	49475.6	1.02174	50551.1	0.428696	21.21	23.331	20	19.76	98.8	76.4268	38.0455	7.92592	160.199	1292.97	1739.22	12283.2	10329.3	214.724	55.4188
TYLR2_Y14	2014	IL	204A	EXP	34417.8	1.53125	52702.2	0.595312	20.4893	22.5383	19.94	17.78	89.1675	77.0315	39.4512	7.73587	224.764	1261.97	1680.13	11988.7	10159.2	149.373	55.9923
TYLR2_Y14	2014	IL	204B	EXP	33342.2	1.54839	51626.7	0.597097	19.9085	21.8994	19.76	18.54	93.8259	76.5019	36.1636	7.04908	211.416	1149.93	1632.5	10924.3	9147.14	144.705	52.5097
TYLR2_Y14	2014	IL	205A	EXP	63457.8	0.983051	62382.2	0.365932	23.2212	25.5434	19.06	16.76	87.9328	77.6907	38.4375	8.2969	130.747	1353.49	1904.14	12858.2	10678.6	275.407	52.9879
TYLR2_Y14	2014	IL	205B	EXP	66684.4	0.967742	64533.3	0.370968	24.7378	27.2116	20.1	19	94.5274	75.966	40.3352	9.99218	149.843	1630.05	2028.5	15485.4	13167.5	289.41	59.9027
TYLR2_Y14	2014	IL	206A	EXP	72062.2	1.07463	77440	0.338657	24.4044	26.8448	18.56	16.26	87.6078	77.6307	38.8339	8.83323	122.578	1440.98	2001.16	13689.3	11375.4	312.75	53.6783
TYLR2_Y14	2014	IL	206B	EXP	83893.3	0.897436	75288.9	0.288974	24.243	26.6673	18.54	16.46	88.781	76.7935	39.0562	9.15536	109.131	1493.53	1987.93	14188.6	11836.5	364.097	56.0061
TYLR2_Y14	2014	IL	207A	EXP	60231.1	0.964286	58080	0.369643	22.264	24.4904	19.94	18.64	93.4804	75.6124	39.2148	8.8718	147.296	1447.28	1825.65	13749.1	11662.1	261.403	59.0957
TYLR2_Y14	2014	IL	207B	EXP	69911.1	0.953846	66684.4	0.344615	24.0924	26.5017	19.98	19.18	95.996	75.7104	38.7088	9.43841	135.006	1539.71	1975.58	14627.2	12348.2	303.414	58.0985
TYLR2_Y14	2014	IL	208A	EXP	96800	0.855556	82817.8	0.250889	24.286	26.7146	18.02	16.02	88.9012	76.2386	37.544	9.0273	93.2572	1472.64	1991.46	13990.1	11578.5	420.112	55.1249
TYLR2_Y14	2014	IL	208B	EXP	101102	0.744681	75288.9	0.213298	21.5649	23.7214	18.66	16.52	88.5316	78.4272	37.8011	7.32734	72.4746	1195.33	1768.32	11355.6	9148.48	438.784	50.3902
TYLR2_Y14	2014	IL	209A	EXP	55928.9	1.01923	57004.4	0.396154	22.1564	24.3721	20.06	19.5	97.2084	76.2344	40.3352	8.84957	158.229	1443.65	1816.83	13714.7	11655.1	242.731	59.2337
TYLR2_Y14	2014	IL	209B	EXP	63457.8	1	63457.8	0.383051	24.3076	26.7383	19.4	18.94	97.6289	76.0497	39.6774	9.62464	151.67	1570.09	1993.22	14915.8	12647.2	275.407	58.7205
TYLR2_Y14	2014	IL	210A	EXP	46248.9	1.18605	54853.3	0.477674	22.0919	24.3011	20.1	19.78	98.408	76.9764	39.6938	8.41236	181.893	1372.33	1811.54	13037.1	11024.8	200.72	56.4718
TYLR2_Y14	2014	IL	210B	EXP	48400	0.933333	45173.3	0.387778	18.7684	20.6453	20.48	19.2	93.75	76.5847	39.2939	7.19519	148.661	1173.77	1539.01	11150.8	9401.72	210.056	56.854
TYLR2_Y14	2014	IL	211A	GRW	57004.4	0.981132	55928.9	0.332264	18.9405	20.8346	20.12	19.46	96.7197	76.5588	38.6761	7.15488	125.514	1167.19	1553.12	11088.3	9287.79	247.399	56.0218
TYLR2_Y14	2014	IL	211B	GRW	54853.3	0.54902	30115.6	0.402745	22.0919	24.3011	19.6	18.26	93.1633	76.0485	39.6774	8.74781	159.476	1427.05	1811.54	13557	11507.4	238.063	58.7236
TYLR2_Y14	2014	IL	211C	GRW	59155.6	0.981818	58080	0.342727	20.2742	22.3016	19.36	18.02	93.0785	77.0428	39.8818	7.73441	130.747	1261.73	1662.49	11986.4	10067.2	256.735	56.5756
UTI_Y14	2014	IL	301A	EXP	78515.6	0.931507	73137.8	0.318219	24.9852	27.4837	18.5	16.3	88.1081	75.1116	44.6491	11.5686	147.341	1887.21	2048.78	17928.5	15539	340.758	68.6666
UTI_Y14	2014	IL	301B	EXP	81742.2	0.881579	72062.2	0.310263	25.3616	27.8978	18.4	16.04	87.1739	75.0492	46.4342	12.243	149.776	1997.22	2079.65	18973.6	16539.2	354.761	71.5909
UTI_Y14	2014	IL	302A	EXP	105404	0.887755	93573.3	0.236224	24.8991	27.389	17.5	14.2	81.1429	76.0319	42.6411	10.6031	100.595	1729.71	2041.73	16432.3	13933.1	457.455	63.1535
UTI_Y14	2014	IL	302B	EXP	108631	0.831683	90346.7	0.204851	22.2532	24.4786	16.06	13.6	84.6824	75.9367	39.7271	8.8639	81.5964	1445.99	1824.77	13736.9	11440.7	471.459	59.0716
UTI_Y14	2014	IL	303A	EXP	92497.8	0.906977	83893.3	0.262791	24.3076	26.7383	17.3	15.8	91.3295	76.8274	42.2901	9.92527	107.303	1619.13	1993.22	15381.7	12987.1	401.44	60.5547
UTI_Y14	2014	IL	303B	EXP	92497.8	0.930233	86044.4	0.267326	24.727	27.1997	17.54	14.3	81.5279	74.7614	43.2556	11.2478	121.601	1834.88	2027.62	17431.3	15002.3	401.44	67.4595
UTI_Y14	2014	IL	304A	EXP	63457.8	0.966102	61306.7	0.384576	24.4044	26.8448	18.16	16.3	89.7577	76.6749	44.0516	10.4482	164.648	1704.44	2001.16	16192.2	13915.6	275.407	63.4923
UTI_Y14	2014	IL	304A	EXP	61306.7	0.947368	58080	0.380351	23.318	25.6498	19.2	17.6	91.6667	77.2791	45.3363	10.0081	163.247	1632.65	1912.08	15510.1	13332	266.071	63.6513
UTI_Y14	2014	IL	305B	EXP	48400	1.15556	55928.9	0.481111	23.2858	25.6144	19.34	18.24	94.3123	77.014	46.1487	10.2921	212.646	1678.97	1909.43	15950.2	13830.7	210.056	65.548
UTI_Y14	2014	IL	305A	EXP	66684.4	0.790323	52702.2	0.319032	21.2745	23.4019	18.26	16.62	91.0186	75.9463	44.4632	9.4805	142.17	1546.57	1744.51	14692.5	12658.5	289.41	66.0875
UTI_Y14	2014	IL	306A	EXP	61306.7	1.07018	65608.9	0.422456	25.8994	28.4893	19.12	18.1	94.6653	75.6254	48.4189	12.736	207.742	2077.64	2123.75	19737.6	17347.8	266.071	72.9271
UTI_Y14	2014	IL	306B	EXP	63457.8	0.983051	62382.2	0.362203	22.9846	25.2831	18.16	16.08	88.5463	75.9402	47.7431	11.0009	173.358	1794.6	1884.74	17048.7	14888.6	275.407	70.9803
UTI_Y14	2014	IL	307A	EXP	83893.3	1.03846	87120	0.327179	27.4482	30.193	17.3	14.5	83.815	76.0112	47.684	13.0823	155.939	2134.14	2250.75	20274.3	17659.5	364.097	70.6833
UTI_Y14	2014	IL	307B	EXP	84968.9	0.936709	79591.1	0.311772	26.4909	29.14	18.48	16.2	87.6623	75.6992	46.3607	12.4353	146.351	2028.6	2172.26	19271.7	16730.6	368.765	69.6154
UTI_Y14	2014	IL	308A	EXP	67760	0.809524	54853.3	0.334603	22.6727	24.94	19.04	18.5	97.1639	75.4851	49.3556	11.4303	168.689	1864.65	1859.16	17714.2	15561	294.078	74.7657
UTI_Y14	2014	IL	308B	EXP	49475.6	1.1087	54853.3	0.441957	21.866	24.0526	17.9	17.92	100.112	78.1092	46.767	9.32739	188.525	1521.6	1793.02	14455.2	12447.4	214.724	63.2611
UTI_Y14	2014	IL	309A	EXP	100027	0.924731	92497.8	0.238495	23.8558	26.2414	16.94	14.06	82.9988	76.9238	43.1417	9.89565	98.9301	1614.3	1956.18	15335.8	12945.5	434.116	61.5172
UTI_Y14	2014	IL	309A	EXP	102178	0.863158	88195.6	0.224737	22.9631	25.2594	17.84	15.6	87.4439	76.3435	44.7868	10.1372	99.2119	1653.71	1882.98	15710.3	13383.8	443.452	65.4691
UTI_Y14	2014	IL	310A	EXP	114009	0.801887	91422.2	0.201038	22.9201	25.2121	16.84	14.5	86.1045	75.2219	43.1123	10.2018	89.4821	1664.23	1879.45	15810.2	13436	494.799	66.0093
UTI_Y14	2014	IL	310B	EXP	114009	0.801887	91422.2	0.196132	22.3608	24.5969	16.1	13.6	84.472	74.6374	45.1735	10.6746	93.6298	1741.37	1833.59	16543.1	14214.7	494.799	70.7966
UTI_Y14	2014	IL	311A	GRW	70986.7	0.878788	62382.2	0.341061	24.2108	26.6318	16.92	14.54	85.9338	77.5522	46.3418	10.4941	147.832	1711.92	1985.28	16263.3	13969.9	308.082	64.2811
UTI_Y14	2014	IL	311B	GRW	58080	0.888889	51626.7	0.377778	21.9413	24.1355	18.52	17	91.7927	77.2143	45.7134	9.52264	163.957	1553.45	1799.19	14757.8	12706.5	252.067	64.3637
UTI_Y14	2014	IL	311C	GRW	63457.8	1.0339	65608.9	0.378814	24.0387	26.4425	19.36	18.3	94.5248	75.2642	43.0759	10.6723	168.18	1741	1971.17	16539.5	14292.9	275.407	65.8408
HV_Y15	2015	IL	1A	EXP	60231.1	0.928571	55928.9	0.323393	19.4783	21.4261	18.86	17.84	94.5917	74.99	39.9694	8.11299	134.698	1323.49	1597.22	12573.2	10714.5	261.403	61.7699
HV_Y15	2015	IL	1B	EXP	66684.4	0.887097	59155.6	0.330968	22.0704	24.2774	19.46	18.5	95.0668	75.5944	40.5014	9.08988	136.312	1482.85	1809.77	14087.1	11987.9	289.41	61.0794
HV_Y15	2015	IL	2A	EXP	166711	0.251613	41946.7	0.0550968	9.18524	10.1038	17.68	14.44	81.6742	77.3172	37.8546	3.2862	19.712	536.085	753.19	5092.81	3616.1	723.526	53.058
HV_Y15	2015	IL	2B	EXP	166711	0.154839	25813.3	0.0343871	5.73271	6.30598	17.26	14	81.1124	78.8585	36.2845	1.83234	10.9911	298.914	470.082	2839.68	1646.07	723.526	47.4016
HV_Y15	2015	IL	3A	EXP	59155.6	0.890909	52702.2	0.314364	18.5964	20.456	19.52	18.38	94.1598	75.3048	39.9719	7.64863	129.297	1247.74	1524.9	11853.5	10071.9	256.735	60.9962
HV_Y15	2015	IL	3B	EXP	64533.3	0.866667	55928.9	0.308333	19.8978	21.8876	18.34	16.9	92.1483	76.72	38.7826	7.48537	115.992	1221.1	1631.62	11600.5	9688.8	280.075	55.7899
HV_Y15	2015	IL	4A	EXP	102178	0.705263	72062.2	0.218737	22.35	24.585	19.06	17.52	91.9203	75.8786	40.0318	8.99238	88.0072	1466.95	1832.7	13936	11659.8	443.452	59.6682
HV_Y15	2015	IL	4B	EXP	93573.3	0.609195	57004.4	0.175287	16.4022	18.0424	18.98	17.1	90.0948	76.1895	39.343	6.40217	68.4188	1044.4	1344.98	9921.8	8170.71	406.108	57.8857
HV_Y15	2015	IL	5A	EXP	60231.1	0.821429	49475.6	0.300536	18.1016	19.9118	18.76	18.34	97.7612	77.4545	38.0003	6.46179	107.283	1054.13	1484.33	10014.2	8268.46	261.403	52.9399
HV_Y15	2015	IL	5B	EXP	47324.4	1.09091	51626.7	0.397273	18.8007	20.6808	19.72	18.72	94.929	77.5592	36.4072	6.40013	135.239	1044.07	1541.66	9918.64	8171.59	205.388	50.4849
HV_Y15	2015	IL	6A	EXP	63457.8	0.779661	49475.6	0.292034	18.5318	20.385	18.98	18.82	99.157	76.8707	39.8642	7.11954	112.193	1161.43	1519.61	11033.5	9238.53	275.407	56.9745
HV_Y15	2015	IL	6B	EXP	59155.6	0.854545	50551.1	0.322364	19.0696	20.9766	19.34	17.82	92.1406	78.23	38.5672	6.67124	112.775	1088.29	1563.71	10338.8	8518.35	256.735	51.8814
HV_Y15	2015	IL	7A	EXP	57004.4	1	57004.4	0.358113	20.414	22.4554	19.54	18.92	96.827	76.1415	40.9813	8.31663	145.894	1356.71	1673.95	12888.7	10967.4	247.399	60.4178
HV_Y15	2015	IL	7B	EXP	63457.8	0.898305	57004.4	0.321017	20.371	22.4081	17.92	16.66	92.9688	76.0957	35.632	7.22967	113.929	1179.39	1670.42	11204.2	9258.39	275.407	52.6323
HV_Y15	2015	IL	8A	EXP	73137.8	0.897059	65608.9	0.301912	22.0812	24.2893	19.6	18.9	96.4286	76.0092	43.2584	9.54829	130.552	1557.63	1810.65	14797.5	12669.4	317.418	64.1285
HV_Y15	2015	IL	8B	EXP	77440	0.819444	63457.8	0.252639	19.5644	21.5208	19.42	17.54	90.3193	76.5447	37.0915	7.09202	91.5808	1156.94	1604.28	10990.9	9050.52	336.09	53.759
HV_Y15	2015	IL	9A	EXP	97875.6	0.648352	63457.8	0.160769	15.7354	17.3089	19.5	16.82	86.2564	79.6122	37.4215	5.00214	51.1072	816.01	1290.3	7752.1	6037.02	424.78	47.1439
HV_Y15	2015	IL	9B	EXP	95724.4	0.741573	70986.7	0.214607	20.5431	22.5974	19.16	17.72	92.4843	78.5528	39.4005	7.23314	75.5621	1179.96	1684.54	11209.6	9109.62	415.444	52.2165
HV_Y15	2015	IL	10A	EXP	86044.4	0.7375	63457.8	0.225875	19.4353	21.3788	19.42	17.62	90.7312	77.8777	40.4059	7.23861	84.1264	1180.85	1593.69	11218.1	9250.95	373.433	55.2346
HV_Y15	2015	IL	10B	EXP	83893.3	0.782051	65608.9	0.234487	19.6719	21.6391	19.52	18	92.2131	77.7	38.9779	7.12457	84.9242	1162.25	1613.1	11041.3	9064.15	364.097	53.7105
HV_Y15	2015	IL	11A	GRW	45173.3	1.07143	48400	0.360952	16.3054	17.936	19.04	18.54	97.3739	75.91	41.4675	6.7868	150.239	1107.15	1337.04	10517.9	8984.79	196.052	61.7277
HV_Y15	2015	IL	11B	GRW	48400	0.844444	40871.1	0.316222	15.3052	16.8357	19.66	19.12	97.2533	76.3489	38.3289	5.78101	119.442	943.068	1255.02	8959.14	7494.07	210.056	56.016
HV_Y15	2015	IL	11C	GRW	.	.	.	.	.	#VALUE!	.	.	.	.	.	.	.	.	#VALUE!	#VALUE!	#VALUE!	#VALUE!	#VALUE!
FF_Y15	2015	IL	1A	EXP	92497.8	0.790698	73137.8	0.216744	20.0484	22.0532	17.94	15.62	87.068	75.6992	44.3177	8.99635	83.6437	1467.59	1643.97	13942.1	11896.7	401.44	66.5479
FF_Y15	2015	IL	1B	EXP	96262.2	0.826816	79591.1	0.228045	21.9521	24.1473	17.82	14.86	83.3895	75.6697	42.7324	9.50973	79.6549	1551.34	1800.07	14737.8	12519.9	417.778	64.245
FF_Y15	2015	IL	2A	EXP	81204.4	0.900662	73137.8	0.288742	23.4471	25.7918	19.16	17.76	92.6931	76.42	43.27	9.96801	113.022	1626.1	1922.66	15448	13172.9	352.427	63.0472
FF_Y15	2015	IL	2B	EXP	79053.3	0.897959	70986.7	0.274966	21.737	23.9107	18.54	17.18	92.6645	76.2771	41.7246	8.96495	87.7387	1462.47	1782.43	13893.5	11768	343.091	61.1639
FF_Y15	2015	IL	3A	EXP	57004.4	1	57004.4	0.335472	19.1234	21.0357	18.28	16.72	91.4661	78.09	40.351	7.04449	99.2368	1149.18	1568.12	10917.2	9101.72	247.399	54.6301
FF_Y15	2015	IL	3B	EXP	55391.1	1.08738	60231.1	0.366602	20.3065	22.3371	19.74	17.38	88.0446	78.0388	40.0276	7.43772	98.7891	1213.33	1665.13	11526.7	9621.12	240.397	54.319
FF_Y15	2015	IL	4A	EXP	39795.6	1.21622	48400	0.424324	16.8862	18.5748	19.8	19.38	97.8788	78.1387	36.9106	5.67737	85.1378	926.161	1384.67	8798.53	7241.15	172.713	49.861
FF_Y15	2015	IL	4B	EXP	43022.2	1.15	49475.6	0.40575	17.4563	19.2019	19.66	18.82	95.7274	77.14	42.4471	7.05772	100.953	1151.34	1431.41	10937.7	9319.61	186.716	59.9598
FF_Y15	2015	IL	5A	EXP	71524.4	0.917293	65608.9	0.29609	21.1777	23.2955	19.76	17.92	90.6883	76.1971	43.5306	9.14306	104.948	1491.53	1736.57	14169.5	12122.5	310.416	64.0265
FF_Y15	2015	IL	5B	EXP	69373.3	0.945736	65608.9	0.303101	21.0271	23.1298	18.58	16.64	89.5587	76.664	43.1284	8.81775	107.873	1438.46	1724.22	13665.4	11640.1	301.08	62.1907
FF_Y15	2015	IL	6A	EXP	84431.1	0.66242	55928.9	0.186879	15.7784	17.3562	18.62	16.84	90.4404	78.2917	41.3781	5.90539	59.6798	963.358	1293.83	9151.91	7491.65	366.431	55.505
FF_Y15	2015	IL	6B	EXP	90346.7	0.72619	65608.9	0.203452	18.3812	20.2194	18.9	16.74	88.5714	76.2595	44.2198	8.04027	77.0666	1311.63	1507.26	12460.5	10561.1	392.105	64.8698
FF_Y15	2015	IL	7A	EXP	73137.8	0.852941	62382.2	0.263529	19.274	21.2014	18.8	16.9	89.8936	76.3395	43.3109	8.22965	100.678	1342.52	1580.46	12753.9	10856.1	317.418	63.3224
FF_Y15	2015	IL	7B	EXP	71524.4	0.932331	66684.4	0.28406	20.3172	22.349	19.3	18.02	93.3679	77.3691	39.3069	7.53052	88.6268	1228.47	1666.01	11670.5	9694.03	310.416	54.9676
FF_Y15	2015	IL	8A	EXP	107018	0.582915	62382.2	0.158593	16.9723	18.6695	18.66	16.12	86.388	76.1115	44.1723	7.46221	64.2408	1217.33	1391.73	11564.6	9708.42	464.457	65.204
FF_Y15	2015	IL	8B	EXP	93035.6	0.728324	67760	0.180694	16.8109	18.492	18.02	15.44	85.6826	75.9613	42.4966	7.15561	66.5294	1167.31	1378.5	11089.4	9307.17	403.774	63.125
FF_Y15	2015	IL	9A	EXP	62382.2	1.06897	66684.4	0.358103	22.3393	24.5732	19.7	17.94	91.066	75.68	40.8153	9.23942	111.563	1507.25	1831.82	14318.8	12216.3	270.739	61.337
FF_Y15	2015	IL	9B	EXP	61844.4	1.04348	64533.3	0.341391	21.1132	23.2245	18.92	15.98	84.4609	76.0987	41.5108	8.7282	102.722	1423.85	1731.28	13526.6	11526.9	268.405	61.3082
FF_Y15	2015	IL	10A	EXP	50551.1	1.02128	51626.7	0.374255	18.919	20.8109	19.56	18.92	96.728	76.56	42.0545	7.77066	107.833	1267.64	1551.36	12042.6	10271.9	219.392	60.9124
FF_Y15	2015	IL	10B	EXP	51088.9	1.07368	54853.3	0.394737	20.1667	22.1833	19.58	18.8	96.0163	76.4894	41.363	8.17143	128.77	1333.02	1653.67	12663.7	10788.3	221.726	60.0912
FF_Y15	2015	IL	11A	GRW	.	.	.	.	.	#VALUE!	.	.	.	.	.	.	.	.	#VALUE!	#VALUE!	#VALUE!	#VALUE!	#VALUE!
FF_Y15	2015	IL	11B	GRW	.	.	.	.	.	#VALUE!	.	.	.	.	.	.	.	.	#VALUE!	#VALUE!	#VALUE!	#VALUE!	#VALUE!
FF_Y15	2015	IL	11C	GRW	.	.	.	.	.	#VALUE!	.	.	.	.	.	.	.	.	#VALUE!	#VALUE!	#VALUE!	#VALUE!	#VALUE!
VC_Y15	2015	IL	1A	EXP	45173.3	0.952381	43022.2	0.377143	17.0368	18.7405	17.98	16.52	91.8799	75.51	41.6124	7.23417	160.142	1180.12	1397.02	11211.2	9618.12	196.052	62.972
VC_Y15	2015	IL	1B	EXP	46248.9	0.697674	32266.7	0.24	11.0997	12.2097	18.86	17.98	95.334	75.19	40.5211	4.64953	100.533	758.487	910.178	7205.63	6094.73	200.72	62.1217
VC_Y15	2015	IL	2A	EXP	84968.9	0.544304	46248.9	0.147722	12.5517	13.8069	17.46	14.34	82.1306	74.5	43.7344	5.83252	68.643	951.471	1029.24	9038.98	7640.97	368.765	68.9127
VC_Y15	2015	IL	2B	EXP	94648.9	0.636364	60231.1	0.158636	15.0148	16.5162	17.26	14.72	85.2839	75.08	42.0109	6.54963	69.1992	1068.46	1231.21	10150.3	8508.34	410.776	64.6912
VC_Y15	2015	IL	3A	EXP	64533.3	0.866667	55928.9	0.276333	17.8327	19.616	18.9	17.1	90.4762	73.96	46.4151	8.98062	139.163	1465.03	1462.28	13917.8	12175.4	280.075	74.6855
VC_Y15	2015	IL	3B	EXP	60231.1	0.785714	47324.4	0.281071	16.9292	18.6222	18.84	16.4	87.0488	75.33	42.8982	7.46509	123.941	1217.8	1388.2	11569.1	9919.45	261.403	65.3949
VC_Y15	2015	IL	4A	EXP	79591.1	0.675676	53777.8	0.191351	15.2299	16.7529	17.38	15.42	88.7227	74.2	43.5717	7.13361	89.6282	1163.72	1248.85	11055.3	9461.07	345.425	69.464
VC_Y15	2015	IL	4B	EXP	77440	0.75	58080	0.190556	14.7566	16.2323	17.18	13.68	79.6275	74.97	42.1038	6.47974	83.6743	1057.05	1210.04	10042	8495.88	336.09	65.1204
VC_Y15	2015	IL	5A	EXP	109707	0.372549	40871.1	0.0772549	8.47538	9.32292	14.78	12.94	87.5507	75.26	41.2054	3.59999	32.8147	587.274	694.981	5579.1	4407.99	476.127	62.9925
VC_Y15	2015	IL	5B	EXP	101102	0.595745	60231.1	0.139787	14.1328	15.5461	17.6	14.64	83.1818	74.82	42.0507	6.23514	61.6716	1017.15	1158.89	9662.94	8065.27	438.784	65.4282
VC_Y15	2015	IL	6A	EXP	60231.1	0.571429	34417.8	0.171786	10.3468	11.3815	18.46	15.86	85.9155	74.36	42.003	4.64296	77.0857	757.415	848.441	7195.45	6085.6	261.403	66.5478
VC_Y15	2015	IL	6B	EXP	55928.9	0.846154	47324.4	0.305385	17.0798	18.7878	19.08	17.96	94.13	74.66	43.0297	7.75973	138.743	1265.86	1400.55	12025.7	10382.4	242.731	67.3768
VC_Y15	2015	IL	7A	EXP	111858	0.230769	25813.3	0.0476923	5.33476	5.86823	15.56	13.16	84.5758	75.35	38.3885	2.1034	18.8042	343.132	437.45	3259.75	2336.84	485.463	58.4728
VC_Y15	2015	IL	7B	EXP	118311	0.0363636	4302.22	0.00636364	0.752889	0.828178	12.1	10.5	86.7769	76.96	35.1887	0.254335	2.14971	41.4902	61.7369	394.157	-181.05	513.47	50.0982
VC_Y15	2015	IL	8A	EXP	77440	0.861111	66684.4	0.276944	21.4466	23.5912	18.76	16.86	89.8721	75.22	42.9027	9.50021	122.678	1549.79	1758.62	14723	12628.3	336.09	65.6934
VC_Y15	2015	IL	8B	EXP	70986.7	0.939394	66684.4	0.303333	21.5326	23.6859	19	16.4	86.3158	74.75	45.3304	10.2692	144.664	1675.24	1765.68	15914.8	13841	308.082	70.7273
VC_Y15	2015	IL	9A	EXP	83893.3	0.564103	47324.4	0.154359	12.9497	14.2447	16.1	14.12	87.7019	74.52	43.3499	5.95986	71.0409	972.245	1061.87	9236.32	7810.35	364.097	68.2533
VC_Y15	2015	IL	9B	EXP	90346.7	0.47619	43022.2	0.118571	10.7125	11.7838	16.46	14.68	89.1859	74.2	43.2958	4.98593	55.1867	813.366	878.428	7726.98	6456.45	392.105	69.0242
VC_Y15	2015	IL	10A	EXP	101102	0.361702	36568.9	0.077234	7.80853	8.58939	14.18	13.34	94.0762	73.93	40.6697	3.44961	34.12	562.742	640.3	5346.05	4266.97	438.784	65.516
VC_Y15	2015	IL	10B	EXP	94648.9	0.636364	60231.1	0.147273	13.9392	15.3331	14.96	12.18	81.4171	74.38	39.2599	5.84191	61.7219	953.003	1143.01	9053.53	7499.74	410.776	62.1532
VC_Y15	2015	IL	11A	GRW	.	.	.	.	.	#VALUE!	.	.	.	.	.	.	.	.	#VALUE!	#VALUE!	#VALUE!	#VALUE!	#VALUE!
VC_Y15	2015	IL	11B	GRW	.	.	.	.	.	#VALUE!	.	.	.	.	.	.	.	.	#VALUE!	#VALUE!	#VALUE!	#VALUE!	#VALUE!
VC_Y15	2015	IL	11C	GRW	.	.	.	.	.	#VALUE!	.	.	.	.	.	.	.	.	#VALUE!	#VALUE!	#VALUE!	#VALUE!	#VALUE!
WY_Y15	2015	WI	1A	EXP	95724.4	0.797753	76364.4	0.274944	26.3188	28.9507	18.14	15.62	86.108	76.1351	43.4577	11.3732	118.812	1855.33	2158.15	17625.6	15052	415.444	64.0858
WY_Y15	2015	WI	1B	EXP	93573.3	0.850575	79591.1	0.278391	26.05	28.655	16.84	14.12	83.848	77.4843	41.8243	10.2214	109.234	1667.44	2136.1	15840.7	13298.5	406.108	58.1903
WY_Y15	2015	WI	2A	EXP	49475.6	1.21739	60231.1	0.547391	27.0825	29.7907	20.1	19.94	99.204	75.1346	41.4014	11.6168	234.799	1895.08	2220.76	18003.2	15567.7	214.724	63.6129
WY_Y15	2015	WI	2B	EXP	48400	1.53333	74213.3	0.614889	29.7606	32.7367	19.92	19.86	99.6988	74.7734	44.137	13.8068	285.264	2252.33	2440.37	21397.1	18746.7	210.056	68.8013
WY_Y15	2015	WI	3A	EXP	39795.6	1.59459	63457.8	0.731892	29.126	32.0386	20.32	19.12	94.0945	75.1566	43.1434	13.0076	326.86	2121.95	2388.34	20158.5	17597.5	172.713	66.231
WY_Y15	2015	WI	3B	EXP	39795.6	1.67568	66684.4	0.709459	28.2333	31.0567	19.28	17.74	92.0124	76.3654	41.1067	11.4291	287.195	1864.45	2315.13	17712.3	15224.4	172.713	60.0338
WY_Y15	2015	WI	4A	EXP	117236	0.495413	58080	0.182385	21.382	23.5202	18.6	15.4	82.7957	77.7557	43.6934	8.65908	73.8605	1412.57	1753.33	13419.5	11157.3	508.802	60.0578
WY_Y15	2015	WI	4B	EXP	96800	0.922222	89271.1	0.314556	30.449	33.4939	18.22	16.9	92.7552	76.734	43.0026	12.6934	131.13	2070.7	2496.82	19671.6	16754.7	420.112	61.8231
WY_Y15	2015	WI	5A	EXP	84968.9	0.886076	75288.9	0.334557	28.4269	31.2696	18.78	18.2	96.9116	77.7448	41.6376	10.9758	129.174	1790.51	2331.01	17009.8	14310	368.765	57.2602
WY_Y15	2015	WI	5B	EXP	76364.4	0.985915	75288.9	0.36	27.4912	30.2403	18.14	16.32	89.9669	78.4886	41.2445	10.1629	133.084	1657.89	2254.28	15750	13164.3	331.422	54.824
WY_Y15	2015	WI	6A	EXP	73137.8	0.970588	70986.7	0.402941	29.4702	32.4172	18.98	18.2	95.8904	77.189	41.1095	11.5149	157.441	1878.45	2416.56	17845.2	15111.3	317.418	57.9459
WY_Y15	2015	WI	6B	EXP	73137.8	0.941176	68835.6	0.358824	26.2436	28.8679	19.18	18.76	97.8102	78.3994	42.1656	9.95947	136.174	1624.71	2151.97	15434.7	12965.3	317.418	56.2808
WY_Y15	2015	WI	7A	EXP	59155.6	1.07273	63457.8	0.464909	27.502	30.2522	19.9	18.94	95.1759	77.8996	39.8858	10.1012	170.756	1647.82	2255.16	15654.3	13142.4	256.735	54.4697
WY_Y15	2015	WI	7B	EXP	52702.2	1.10204	58080	0.432857	22.8125	25.0938	19.2	16.8	87.5	78.3629	40.9165	8.41511	159.673	1372.77	1870.63	13041.4	10942	228.728	54.7058
WY_Y15	2015	WI	8A	EXP	88195.6	0.878049	77440	0.312927	27.5988	30.3586	18.08	16.6	91.8142	77.8463	40.2984	10.2663	116.403	1674.76	2263.1	15910.2	13264.3	382.769	55.1657
WY_Y15	2015	WI	8B	EXP	89271.1	0.987952	88195.6	0.339518	30.3092	33.3401	18.98	18.54	97.6818	77.5422	44.3472	12.5775	140.891	2051.8	2485.35	19492.1	16619.3	387.437	61.5415
WY_Y15	2015	WI	9A	EXP	65608.9	1.01639	66684.4	0.465082	30.5135	33.5649	19.52	19.46	99.6926	77.1645	43.4083	12.6027	192.089	2055.91	2502.11	19531.1	16744.3	284.743	61.2518
WY_Y15	2015	WI	9B	EXP	66684.4	1.06452	70986.7	0.418548	27.9107	30.7017	18.86	17.74	94.0615	76.8495	42.1748	11.3546	170.274	1852.31	2288.67	17596.9	15018.8	289.41	60.3323
WY_Y15	2015	WI	10A	EXP	69911.1	0.969231	67760	0.422308	29.524	32.4764	19.1	17.96	94.0314	77.5421	41.9892	11.6003	165.93	1892.39	2420.97	17977.7	15253.3	303.414	58.2696
WY_Y15	2015	WI	10B	EXP	62382.2	1.01724	63457.8	0.426552	26.6092	29.2702	19.36	18.54	95.7645	77.2546	44.6944	11.2711	180.679	1838.68	2181.96	17467.5	15014.8	270.739	62.8177
WY_Y15	2015	WI	11A	GRW	57004.4	1.11321	63457.8	0.453396	25.8456	28.4302	19.72	19.6	99.3915	76.7664	45.0533	11.2725	197.747	1838.9	2119.34	17469.6	15102.8	247.399	64.6814
WY_Y15	2015	WI	11B	GRW	58080	1.11111	64533.3	0.493889	28.6851	31.5536	19.54	17.5	89.5599	77.9462	47.3414	12.4787	214.854	2035.68	2352.18	19339	16734.7	252.067	64.5151
WY_Y15	2015	WI	11C	GRW	59155.6	1.2	70986.7	0.478	28.2764	31.104	19.62	19.44	99.0826	77.8529	46.3721	12.1	204.545	1973.9	2318.66	18752	16176.6	256.735	63.4612
PMT_Y15	2015	WI	1A	EXP	57004.4	0.981132	55928.9	0.370566	21.1239	23.2363	19.4	18.02	92.8866	.	40.3025	8.51347	149.348	1388.82	1732.16	13193.8	11214.2	247.399	59.7695
PMT_Y15	2015	WI	1B	EXP	60231.1	0.928571	55928.9	0.340357	20.5001	22.5501	20.04	19.16	95.6088	.	37.9023	7.77001	129.003	1267.54	1681.01	12041.6	10099.2	261.403	56.2099
PMT_Y15	2015	WI	2A	EXP	78515.6	0.90411	70986.7	0.283836	22.2855	24.5141	19.1	17.4	91.0995	.	35.3952	7.888	100.464	1286.79	1827.41	12224.5	10056.3	340.758	52.4918
PMT_Y15	2015	WI	2B	EXP	82817.8	0.753247	62382.2	0.242078	20.0484	22.0532	19.78	18.62	94.1355	.	35.018	7.02054	84.7709	1145.28	1643.97	10880.1	8876.72	359.429	51.9324
PMT_Y15	2015	WI	3A	EXP	58080	0.944444	54853.3	0.358148	20.8012	22.8814	19.84	19.08	96.1694	.	34.8206	7.24311	124.709	1181.58	1705.7	11225.1	9267.28	252.067	51.6396
PMT_Y15	2015	WI	3B	EXP	52702.2	0.938776	49475.6	0.384694	20.2742	22.3016	20.1	19.7	98.01	.	36.7531	7.4514	141.387	1215.56	1662.49	11547.8	9656.63	228.728	54.5055
PMT_Y15	2015	WI	4A	EXP	61306.7	0.947368	58080	0.342281	20.9841	23.0825	19.52	18.76	96.1066	.	39.1794	8.22144	134.104	1341.18	1720.7	12741.2	10754.5	266.071	58.1038
PMT_Y15	2015	WI	4B	EXP	55928.9	0.942308	52702.2	0.359615	20.1129	22.1242	19.74	19.2	97.2644	.	40.7741	8.20086	146.63	1337.82	1649.26	12709.3	10817.3	242.731	60.4688
PMT_Y15	2015	WI	5A	EXP	40871.1	1.02632	41946.7	0.424474	17.3487	19.0836	20.26	19.98	98.618	.	39.3517	6.82702	167.038	1113.71	1422.59	10580.2	8980.23	177.381	58.3594
PMT_Y15	2015	WI	5B	EXP	37644.4	1.2	45173.3	0.507429	19.1019	21.0121	19.66	18.66	94.9135	.	37.7278	7.20671	191.442	1175.65	1566.35	11168.6	9438.91	163.377	55.951
PMT_Y15	2015	WI	6A	EXP	48400	1	48400	0.410667	19.8763	21.8639	19.98	19.58	97.998	.	44.904	8.92523	184.406	1455.99	1629.85	13831.9	11992	210.056	66.5935
PMT_Y15	2015	WI	6B	EXP	48400	1.02222	49475.6	0.446889	21.6294	23.7924	19.04	18.5	97.1639	.	41.6687	9.0127	186.213	1470.26	1773.61	13967.5	11983.8	210.056	61.7955
PMT_Y15	2015	WI	7A	EXP	65608.9	0.901639	59155.6	0.319344	20.9518	23.047	19.5	18.16	93.1282	.	41.5918	8.71425	132.821	1421.57	1718.05	13505	11502.2	284.743	61.6815
PMT_Y15	2015	WI	7B	EXP	61306.7	0.947368	58080	0.368421	22.5867	24.8453	19.4	18.54	95.567	.	36.7709	8.30532	135.472	1354.86	1852.11	12871.2	10753	266.071	54.532
PMT_Y15	2015	WI	8A	EXP	90346.7	0.833333	75288.9	0.24631	22.2532	24.4786	18.16	16.28	89.6476	.	36.036	8.01919	88.7602	1308.19	1824.77	12427.8	10210.9	392.105	53.4421
PMT_Y15	2015	WI	8B	EXP	81742.2	0.789474	64533.3	0.259079	21.1777	23.2955	19.14	17.4	90.9091	.	37.9872	8.04481	98.4169	1312.37	1736.57	12467.5	10376.2	354.761	56.3358
PMT_Y15	2015	WI	9A	EXP	76364.4	0.971831	74213.3	0.313803	23.9634	26.3597	18.92	18.14	95.8774	.	41.0959	9.84796	128.96	1606.52	1965	15261.9	12965.5	331.422	60.946
PMT_Y15	2015	WI	9B	EXP	76364.4	0.943662	72062.2	0.324366	24.77	27.247	19	18.48	97.2632	.	42.3374	10.487	137.328	1710.76	2031.14	16252.3	13889.7	331.422	62.7871
PMT_Y15	2015	WI	10A	EXP	100027	0.827957	82817.8	0.230968	23.1029	25.4132	18.5	16.92	91.4595	.	42.279	9.76769	97.6509	1593.42	1894.44	15137.5	12809	434.116	62.7006
PMT_Y15	2015	WI	10B	EXP	105404	0.72449	76364.4	0.203878	21.4896	23.6386	17.12	15.5	90.5374	.	38.6638	8.30869	78.8267	1355.41	1762.15	12876.4	10656.8	457.455	57.3391
PMT_Y15	2015	WI	11A	GRW	61306.7	0.947368	58080	0.370702	22.7265	24.9991	19.24	18.38	95.5301	.	42.0133	9.54815	155.744	1557.61	1863.57	14797.3	12667.6	266.071	62.3065
PMT_Y15	2015	WI	11B	GRW	60231.1	1.01786	61306.7	0.39375	23.716	26.0876	19.46	19.18	98.5612	.	38.48	9.12592	151.515	1488.73	1944.71	14142.9	11936.8	261.403	57.0666
PMT_Y15	2015	WI	11C	GRW	59155.6	0.890909	52702.2	0.343818	20.3388	22.3726	19.5	18.7	95.8974	.	35.1421	7.14747	120.825	1165.98	1667.78	11076.8	9152.32	256.735	52.1165
HOFS_Y15	2015	MN	1A	EXP	92497.8	0.848837	78515.6	0.243837	22.5544	24.8098	19.02	15.6	82.0189	76.8847	39.2352	8.52305	92.1433	1390.38	1849.46	13208.6	10957.7	401.44	56.0416
HOFS_Y15	2015	MN	1B	EXP	94648.9	0.920455	87120	0.247955	23.4686	25.8155	18.08	15.06	83.2965	76.3179	41.8116	9.68264	102.301	1579.55	1924.43	15005.7	12670.5	410.776	61.1862
HOFS_Y15	2015	MN	2A	EXP	89271.1	0.843373	75288.9	0.252048	22.5006	24.7507	17.66	13.38	75.7644	76.895	38.9593	8.43917	94.5342	1376.7	1845.05	13078.7	10846.2	387.437	55.6227
HOFS_Y15	2015	MN	2B	EXP	87120	0.950617	82817.8	0.277284	24.157	26.5727	18.5	13.86	74.9189	77.0011	40.6184	9.40289	107.93	1533.91	1980.87	14572.2	12213.2	378.101	57.7252
HOFS_Y15	2015	MN	3A	EXP	51626.7	0.958333	49475.6	0.41375	21.3605	23.4966	20.98	20.42	97.3308	80.9129	46.9095	7.96897	154.358	1299.99	1751.56	12350	10374.3	224.06	55.327
HOFS_Y15	2015	MN	3B	EXP	53777.8	1	53777.8	0.4276	22.9954	25.2949	20.34	20.02	98.4267	77.875	45.7532	9.69917	180.356	1582.25	1885.62	15031.3	12912.3	233.396	62.5519
HOFS_Y15	2015	MN	4A	EXP	70986.7	1	70986.7	0.343333	24.3721	26.8093	19.86	17.64	88.8218	75.7154	45.9257	11.3258	159.548	1847.6	1998.51	17552.2	15245.6	308.082	68.9162
HOFS_Y15	2015	MN	4B	EXP	72062.2	0.970149	69911.1	0.335821	24.2	26.62	19.16	17.18	89.666	75.7511	45.8131	11.2018	155.446	1827.37	1984.4	17360	15062.8	312.75	68.6464
HOFS_Y15	2015	MN	5A	EXP	57004.4	0.943396	53777.8	0.373962	21.3175	23.4493	20.32	19.94	98.1299	76.6395	46.9458	9.74102	170.882	1589.07	1748.04	15096.2	13100.8	247.399	67.7664
HOFS_Y15	2015	MN	5B	EXP	57004.4	0.962264	54853.3	0.385094	21.9521	24.1473	20.18	19.76	97.9187	77.9392	44.5194	8.98329	157.589	1465.46	1800.07	13921.9	11874.4	247.399	60.6885
HOFS_Y15	2015	MN	6A	EXP	50551.1	1	50551.1	0.431064	21.7908	23.9698	20.76	20.28	97.6879	76.0697	45.0075	9.77902	193.448	1595.27	1786.84	15155.1	13148.9	219.392	66.5534
HOFS_Y15	2015	MN	6B	EXP	53777.8	0.9	48400	0.3802	20.4463	22.4909	20.8	20.3	97.5962	77.1344	45.8959	8.94047	166.248	1458.48	1676.6	13855.5	11945.5	233.396	64.8474
HOFS_Y15	2015	MN	7A	EXP	89271.1	0.86747	77440	0.23747	21.1992	23.3191	17.12	14.78	86.3318	76.3741	42.0113	8.76723	98.209	1430.22	1738.33	13587.1	11461.3	387.437	61.3324
HOFS_Y15	2015	MN	7B	EXP	89271.1	0.939759	83893.3	0.262892	23.4686	25.8155	16.8	14.22	84.6429	76.1219	41.0948	9.59538	107.486	1565.32	1924.43	14870.5	12558.6	387.437	60.6348
HOFS_Y15	2015	MN	8A	EXP	101102	0.787234	79591.1	0.202553	20.4786	22.5264	17.42	13.84	79.4489	76.2892	40.8375	8.26218	81.7211	1347.83	1679.24	12804.4	10686.3	438.784	59.8332
HOFS_Y15	2015	MN	8B	EXP	103253	0.875	90346.7	0.215208	22.221	24.4431	16.8	14.02	83.4524	75.7522	40.9174	9.18614	88.967	1498.55	1822.12	14236.3	11966	448.119	61.3079
HOFS_Y15	2015	MN	9A	EXP	79591.1	0.986486	78515.6	0.300135	23.8881	26.2769	18.9	15.8	83.5979	75.2821	44.1259	10.8561	136.399	1770.98	1958.82	16824.3	14520.1	345.425	67.397
HOFS_Y15	2015	MN	9B	EXP	77440	0.902778	69911.1	0.292222	22.6297	24.8927	19.08	16.72	87.631	76.7166	44.5848	9.78815	126.397	1596.76	1855.63	15169.2	12977.5	336.09	64.1459
HOFS_Y15	2015	MN	10A	EXP	65608.9	0.983607	64533.3	0.351967	23.0922	25.4014	20	18.36	91.8	75.7151	46.9888	10.9795	167.348	1791.11	1893.56	17015.6	14837.3	284.743	70.5124
HOFS_Y15	2015	MN	10B	EXP	63457.8	0.966102	61306.7	0.364746	23.146	25.4606	20.54	19.46	94.742	76.316	42.5838	9.72663	153.277	1586.73	1897.97	15073.9	12900.5	275.407	62.321
HOFS_Y15	2015	MN	11A	GRW	57004.4	0.981132	55928.9	0.399623	22.7803	25.0583	20.38	19.58	96.0746	76.3289	47.8416	10.7491	188.566	1753.52	1867.98	16658.5	14543.1	247.399	69.9777
HOFS_Y15	2015	MN	11B	GRW	49475.6	1	49475.6	0.447826	22.1564	24.3721	21.04	20.74	98.5741	78.8634	45.1031	8.80098	177.885	1435.72	1816.83	13639.4	11607.8	214.724	58.9085
HOFS_Y15	2015	MN	11C	GRW	57004.4	1	57004.4	0.402264	22.9308	25.2239	20.92	20.7	98.9484	75.9848	47.6388	10.9309	191.755	1783.18	1880.33	16940.2	14812.5	247.399	70.6939
HOFF_Y15	2015	MN	1A	EXP	46248.9	1.04651	48400	0.450233	20.8228	22.905	21.12	20.34	96.3068	76.5752	45.1407	9.17429	198.368	1496.62	1707.47	14217.9	12309.7	200.72	65.3403
HOFF_Y15	2015	MN	1B	EXP	45173.3	1.04762	47324.4	0.478095	21.5972	23.7569	20.84	20.34	97.6008	77.1067	45.8477	9.44522	209.088	1540.82	1770.97	14637.8	12670.8	196.052	64.8578
HOFF_Y15	2015	MN	2A	EXP	90346.7	0.952381	86044.4	0.278929	25.2003	27.7203	18.88	15.92	84.322	76.8452	43.3286	10.5344	116.6	1718.5	2066.42	16325.7	13867.2	392.105	61.9942
HOFF_Y15	2015	MN	2B	EXP	90346.7	0.892857	80666.7	0.264048	23.8558	26.2414	18.28	16.14	88.2932	75.4072	42.6506	10.4259	115.399	1700.81	1956.18	16157.7	13809.4	392.105	64.8138
HOFF_Y15	2015	MN	3A	EXP	53777.8	0.96	51626.7	0.4252	22.8663	25.1529	20.52	19.8	96.4912	75.9613	47.2273	10.8166	201.135	1764.53	1875.04	16763	14654.6	233.396	70.152
HOFF_Y15	2015	MN	3B	EXP	57004.4	0.943396	53777.8	0.393962	22.4576	24.7034	20.24	19.92	98.419	76.5396	43.0603	9.4529	165.827	1542.07	1841.52	14649.7	12560.8	247.399	62.4235
HOFF_Y15	2015	MN	4A	EXP	69911.1	0.969231	67760	0.367846	25.7165	28.2882	19.76	17.38	87.9555	75.1723	44.7397	11.9023	170.249	1941.64	2108.76	18445.6	16033.4	303.414	68.6379
HOFF_Y15	2015	MN	4B	EXP	67760	0.952381	64533.3	0.362857	24.5872	27.0459	20.7	19.72	95.2657	75.1842	48.2773	12.2735	181.132	2002.2	2016.15	19020.9	16710.7	294.078	74.0298
HOFF_Y15	2015	MN	5A	EXP	79591.1	0.972973	77440	0.313243	24.9314	27.4245	18.68	16.42	87.9015	76.484	43.5472	10.638	133.658	1735.4	2044.37	16486.3	14096.5	345.425	63.279
HOFF_Y15	2015	MN	5B	EXP	82817.8	0.922078	76364.4	0.316234	26.1898	28.8088	19	16.98	89.3684	75.809	44.0789	11.636	140.502	1898.21	2147.56	18033	15526	359.429	65.8902
HOFF_Y15	2015	MN	6A	EXP	64533.3	0.916667	59155.6	0.372333	24.0279	26.4307	20	18.08	90.4	75.725	46.7875	11.3709	176.202	1854.96	1970.29	17622.1	15371.7	280.075	70.1819
HOFF_Y15	2015	MN	6B	EXP	61306.7	1	61306.7	0.404211	24.7808	27.2589	20.22	19.2	94.9555	76.2142	46.6858	11.4658	187.025	1870.45	2032.03	17769.3	15471.2	266.071	68.6179
HOFF_Y15	2015	MN	7A	EXP	83893.3	0.871795	73137.8	0.288462	24.2	26.62	19.1	16.58	86.8063	75.88	43.746	10.6394	126.821	1735.64	1984.4	16488.5	14140	364.097	65.2005
HOFF_Y15	2015	MN	7B	EXP	92497.8	0.872093	80666.7	0.258837	23.9419	26.3361	19.52	16.68	85.4508	75.7988	43.7873	10.5714	114.288	1724.53	1963.23	16383.1	14018.4	401.44	65.4819
HOFF_Y15	2015	MN	8A	EXP	76364.4	0.957746	73137.8	0.331127	25.2863	27.8149	19.04	17.5	91.9118	75.6654	46.7495	11.986	156.958	1955.31	2073.48	18575.4	16170.5	331.422	70.2969
HOFF_Y15	2015	MN	8B	EXP	79591.1	0.905405	72062.2	0.313514	24.9529	27.4482	18.88	15.68	83.0508	78.2102	43.1685	9.77978	122.875	1595.4	2046.14	15156.3	12764.7	345.425	58.124
HOFF_Y15	2015	MN	9A	EXP	46248.9	1.04651	48400	0.470698	21.7692	23.9462	20.72	20.42	98.5521	76.0106	44.8946	9.7689	211.225	1593.62	1785.08	15139.4	13153.6	200.72	66.5502
HOFF_Y15	2015	MN	9B	EXP	51626.7	1.02083	52702.2	0.437083	22.5652	24.8217	20.04	19.22	95.9082	81.5299	47.6819	8.2804	160.39	1350.8	1850.34	12832.6	10758.2	224.06	54.4202
HOFF_Y15	2015	MN	10A	EXP	102178	0.905263	92497.8	0.244211	24.9529	27.4482	16.66	14.84	89.0756	77.6467	42.1719	9.80108	95.9219	1598.87	2046.14	15189.3	12699.7	443.452	58.2506
HOFF_Y15	2015	MN	10B	EXP	100027	0.817204	81742.2	0.232151	23.2212	25.5434	16.82	14.84	88.2283	81.0601	42.2402	7.74067	77.3861	1262.75	1904.14	11996.1	9657.89	434.116	49.4356
HOFF_Y15	2015	MN	11A	GRW	59155.6	0.981818	58080	0.401818	23.7698	26.1468	20	18.8	94	75.4935	47.5327	11.5369	195.026	1882.04	1949.12	17879.4	15673.5	256.735	71.9798
HOFF_Y15	2015	MN	11B	GRW	57004.4	0.943396	53777.8	0.398491	22.7157	24.9873	20.98	20.44	97.4261	77.2341	48.4783	10.4459	183.247	1704.06	1862.69	16188.6	14078.5	247.399	68.1972
HOFF_Y15	2015	MN	11C	GRW	59155.6	0.981818	58080	0.412364	24.3936	26.833	21.36	20.14	94.2884	80.7474	46.3008	9.06031	153.161	1478.03	2000.28	14041.3	11784.2	256.735	55.0825
MRT_FY15	2015	WI	1A	EXP	95724.4	0.831461	79591.1	0.23382	22.3823	24.6205	18.24	16.3	89.364	75.1555	45.0687	10.4424	109.088	1703.49	1835.35	16183.1	13932.3	415.444	69.1896
MRT_FY15	2015	WI	1B	EXP	83893.3	1.01282	84968.9	0.315385	26.4587	29.1045	18.18	16.28	89.549	74.2792	50.6487	14.3618	171.191	2342.87	2169.61	22257.3	19723.6	364.097	80.4985
MRT_FY15	2015	WI	2A	EXP	48400	1.15556	55928.9	0.481556	23.3073	25.638	17.92	16.78	93.6384	75.4218	46.0001	10.9797	226.853	1791.14	1911.2	17015.8	14894.6	210.056	69.8626
MRT_FY15	2015	WI	2B	EXP	47324.4	1.20455	57004.4	0.482727	22.8448	25.1293	18.06	17.3	95.7918	76.326	46.868	10.5615	223.172	1722.92	1873.27	16367.7	14289.1	205.388	68.5622
MRT_FY15	2015	WI	3A	EXP	44097.8	1.21951	53777.8	0.528537	23.3073	25.638	18.72	17.62	94.1239	75.8337	48.9733	11.4935	260.636	1874.95	1911.2	17812	15709.5	191.384	73.1317
MRT_FY15	2015	WI	3B	EXP	35493.3	1.39394	49475.6	0.590909	20.9733	23.0707	20.32	20.2	99.4094	75.383	51.923	11.17	314.706	1822.18	1719.81	17310.7	15436.9	154.041	78.9826
MRT_FY15	2015	WI	4A	EXP	80666.7	0.946667	76364.4	0.312667	25.2218	27.744	17.82	16.26	91.2458	74.5319	48.7184	13.0393	161.644	2127.12	2068.19	20207.7	17789.4	350.093	76.6698
MRT_FY15	2015	WI	4B	EXP	66684.4	1.09677	73137.8	0.366452	24.4366	26.8803	18.68	17.06	91.3276	74.6791	51.2301	13.2079	198.066	2154.64	2003.8	20469	18175.8	289.41	80.1568
MRT_FY15	2015	WI	5A	EXP	82817.8	0.935065	77440	0.29987	24.8346	27.318	17.86	15.84	88.6898	74.8743	45.7406	11.8923	143.596	1940.01	2036.44	18430.1	16034.3	359.429	71.0159
MRT_FY15	2015	WI	5B	EXP	77440	0.972222	75288.9	0.311806	24.1462	26.5608	17.94	15.8	88.0713	74.8303	48.5314	12.2896	158.699	2004.84	1979.99	19045.9	16729.9	336.09	75.4808
MRT_FY15	2015	WI	6A	EXP	62382.2	0.982759	61306.7	0.388621	24.243	26.6673	18.7	17.94	95.9358	74.5786	50.0922	12.8631	206.198	2098.38	1987.93	19934.6	17675.9	270.739	78.6873
MRT_FY15	2015	WI	6B	EXP	59155.6	0.945455	55928.9	0.352	20.8228	22.905	18.98	17.96	94.6259	75.7455	48.4501	10.1957	172.353	1663.24	1707.47	15800.8	13836.6	256.735	72.6145
MRT_FY15	2015	WI	7A	EXP	69911.1	1	69911.1	0.349077	24.4044	26.8448	18.9	17.38	91.9577	75.3014	46.5565	11.6925	167.248	1907.43	2001.16	18120.6	15816	303.414	71.0539
MRT_FY15	2015	WI	7B	EXP	68835.6	0.96875	66684.4	0.29625	20.3925	22.4318	18.02	15.9	88.2353	75.2976	48.28	10.1337	147.215	1653.13	1672.19	15704.7	13733.8	298.746	73.6957
MRT_FY15	2015	WI	8A	EXP	95724.4	0.775281	74213.3	0.206966	19.8117	21.7929	17.08	14.86	87.0023	77.7494	43.6617	8.0196	83.7779	1308.25	1624.56	12428.4	10388.4	415.444	60.0312
MRT_FY15	2015	WI	8B	EXP	86044.4	0.9625	82817.8	0.23675	20.371	22.4081	17.32	15.72	90.7621	77.078	45.6904	8.88953	103.313	1450.17	1670.42	13776.6	11732.7	373.433	64.7162
MRT_FY15	2015	WI	9A	EXP	59155.6	1.03636	61306.7	0.408364	24.157	26.5727	18.7	17.86	95.508	74.6995	49.351	12.5677	212.452	2050.2	1980.87	19476.9	17239.3	256.735	77.1544
MRT_FY15	2015	WI	9B	EXP	53777.8	0.98	52702.2	0.3704	19.9193	21.9112	19.22	18.38	95.6296	76.0264	45.6988	9.09287	169.082	1483.34	1633.38	14091.7	12224.9	233.396	67.6977
MRT_FY15	2015	WI	10A	EXP	105404	0.816327	86044.4	0.213265	22.4791	24.727	16.7	14.36	85.988	76.1909	43.3964	9.67751	91.8131	1578.71	1843.29	14997.8	12697	457.455	63.8456
MRT_FY15	2015	WI	10B	EXP	94648.9	0.852273	80666.7	0.220682	20.8873	22.976	17.22	14.4	83.6237	75.5765	45.3286	9.635	101.797	1571.78	1712.76	14931.9	12808.4	410.776	68.4095
MRT_FY15	2015	WI	11A	GRW	60231.1	0.964286	58080	0.414107	24.9421	27.4363	19.86	18.76	94.4612	75.2497	50.5573	13.0043	215.907	2121.42	2045.25	20153.5	17846.8	261.403	77.3214
MRT_FY15	2015	WI	11B	GRW	57004.4	1.0566	60231.1	0.398868	22.7372	25.011	18.3	16.88	92.2404	75.0515	51.8135	12.2465	214.835	1997.81	1864.45	18979.1	16867.3	247.399	79.8772
MRT_FY15	2015	WI	11C	GRW	55928.9	1.07692	60231.1	0.417115	23.3288	25.6617	18.84	17.74	94.1614	74.7482	47.7943	11.7314	209.756	1913.77	1912.96	18180.8	16025.1	242.731	74.577
HV_Y16	2016	IL	1A	EXP	91422.2	0.811765	74213.3	0.260353	23.802	26.1822	16.36	13.56	82.8851	78.2669	43.7869	9.43775	103.233	1539.6	1951.77	14626.2	12277.7	396.772	58.8032
HV_Y16	2016	IL	1B	EXP	92497.8	0.895349	82817.8	0.294419	27.2331	29.9564	16.84	13.18	78.266	78.3611	45.5698	11.1892	120.967	1825.31	2233.11	17340.5	14705.9	401.44	60.9323
HV_Y16	2016	IL	2A	EXP	95724.4	0.741573	70986.7	0.240899	23.0599	25.3659	19.56	16.72	85.4806	76.829	48.5663	10.8125	112.954	1763.86	1890.91	16756.7	14450.3	415.444	69.5368
HV_Y16	2016	IL	2B	EXP	94648.9	0.863636	81742.2	0.267841	25.3508	27.8859	19.2	16.14	84.0625	78.1987	48.2351	11.1078	117.357	1812.03	2078.77	17214.3	14724.8	410.776	64.9802
HV_Y16	2016	IL	3A	EXP	64533.3	0.95	61306.7	0.366333	23.6407	26.0048	20.32	18.88	92.9134	76.6962	48.9773	11.2427	174.215	1834.05	1938.54	17423.4	15204.8	280.075	70.5272
HV_Y16	2016	IL	3B	EXP	77440	0.930556	72062.2	0.328917	25.4713	28.0184	20.66	18.46	89.3514	77.3295	48.262	11.612	149.948	1894.29	2088.65	17995.8	15571	336.09	67.6087
HV_Y16	2016	IL	4A	EXP	60231.1	1.07143	64533.3	0.438893	26.435	29.0785	16.62	13.06	78.58	78.0951	42.2625	10.1968	169.294	1663.42	2167.67	15802.5	13373.5	261.403	57.2046
HV_Y16	2016	IL	4B	EXP	57004.4	1.03774	59155.6	0.426453	24.3097	26.7407	19.4	18.28	94.2268	79.1796	47.4992	10.0172	175.726	1634.12	1993.4	15524.1	13283.3	247.399	61.1099
HV_Y16	2016	IL	5A	EXP	47324.4	1.11364	52702.2	0.439091	20.7797	22.8577	18.74	16.52	88.1537	79.675	44.3688	7.80793	164.987	1273.72	1703.94	12100.4	10191.1	205.388	55.7241
HV_Y16	2016	IL	5B	EXP	51626.7	1.04167	53777.8	0.41575	21.4638	23.6102	18.84	16.86	89.4904	78.3746	45.9788	8.89237	172.244	1450.63	1760.03	13781	11796.9	224.06	61.4409
HV_Y16	2016	IL	6A	EXP	81742.2	0.960526	78515.6	0.307895	25.168	27.6848	18.96	15.4	81.2236	79.657	44.539	9.50153	116.238	1550.01	2063.78	14725.1	12306.5	354.761	55.9876
HV_Y16	2016	IL	6B	EXP	78515.6	0.90411	70986.7	0.27863	21.8768	24.0645	19	16.96	89.2632	78.7906	46.3214	8.95534	114.058	1460.9	1793.9	13878.6	11743.9	340.758	60.7079
HV_Y16	2016	IL	7A	EXP	59155.6	1.05455	62382.2	0.402764	23.8257	26.2083	20.62	19.14	92.8225	78.8876	46.9881	9.8483	166.481	1606.57	1953.71	15262.5	13052	256.735	61.3003
HV_Y16	2016	IL	7B	EXP	65608.9	1	65608.9	0.396164	25.9919	28.5911	21.02	19.92	94.7669	78.6705	#VALUE!	#VALUE!	#VALUE!	#VALUE!	2131.33	#VALUE!	#VALUE!	284.743	#VALUE!
HV_Y16	2016	IL	8A	EXP	49475.6	0.956522	47324.4	0.392696	19.4288	21.3717	20.38	18.72	91.8548	79.1592	44.5959	7.52394	152.074	1227.4	1593.16	11660.3	9852.38	214.724	57.4309
HV_Y16	2016	IL	8B	EXP	44097.8	1.02439	45173.3	0.395854	17.4563	19.2019	19.12	17.54	91.7364	78.8748	43.3159	6.65563	150.929	1085.75	1431.41	10314.6	8691.8	191.384	56.5437
HV_Y16	2016	IL	9A	EXP	97875.6	0.857143	83893.3	0.246374	24.114	26.5254	16.84	11.44	67.9335	77.477	42.1316	9.53435	97.413	1555.36	1977.34	14775.9	12373.8	424.78	58.6367
HV_Y16	2016	IL	9B	EXP	101102	0.851064	86044.4	0.267617	27.0567	29.7623	19.14	15.94	83.2811	77.0482	48.3195	12.5026	123.663	2039.58	2218.65	19376	16718.6	438.784	68.529
HV_Y16	2016	IL	10A	EXP	75288.9	1.01429	76364.4	0.346343	26.0758	28.6833	18.44	15.56	84.3818	77.8222	49.9633	12.0392	159.906	1963.97	2138.21	18657.7	16192.8	326.754	68.4708
HV_Y16	2016	IL	10B	EXP	84968.9	0.898734	76364.4	0.302886	25.7359	28.3095	19.24	16.12	83.7838	78.2123	48.0162	11.2183	132.029	1830.07	2110.34	17385.6	14906.5	368.765	64.6451
HV_Y16	2016	IL	11A	GRW	67760	0.920635	62382.2	0.380286	25.7682	28.345	20.18	18.56	91.9722	78.1471	48.0354	11.2705	166.329	1838.57	2112.99	17466.4	15059.4	294.078	64.8642
HV_Y16	2016	IL	11B	GRW	64533.3	0.9	58080	0.348833	22.5114	24.7625	17.32	14.46	83.4873	78.2396	43.2449	8.8266	136.776	1439.9	1845.93	13679.1	11553.1	280.075	58.1484
HV_Y16	2016	IL	11C	GRW	74213.3	0.985507	73137.8	0.374812	27.816	30.5976	20.02	18.72	93.5065	78.1922	47.0079	11.8814	160.098	1938.23	2280.91	18413.2	15810.2	322.086	63.3459
VC_Y16	2016	IL	1A	EXP	57004.4	0.90566	51626.7	0.350792	19.9967	21.9964	20.42	19.56	95.7884	79.0405	42.5638	7.4331	130.395	1212.58	1639.73	11519.5	9632.35	247.399	55.1262
VC_Y16	2016	IL	1B	EXP	41946.7	1.12821	47324.4	0.429026	17.9962	19.7958	19.74	18.56	94.0223	79.4685	42.6231	6.56199	156.437	1070.47	1475.69	10169.5	8511.75	182.049	54.0757
VC_Y16	2016	IL	2A	EXP	86044.4	0.875	75288.9	0.273325	23.5181	25.8699	19.14	17.26	90.1776	78.3054	42.7811	9.09484	105.699	1483.66	1928.48	14094.8	11792.9	373.433	57.3508
VC_Y16	2016	IL	2B	EXP	84968.9	0.822785	69911.1	0.260582	22.1414	24.3555	19.22	17.5	91.051	79.3545	44.989	8.56893	100.848	1397.87	1815.59	13279.8	11095.4	368.765	57.3943
VC_Y16	2016	IL	3A	EXP	62382.2	0.948276	59155.6	0.355414	22.1715	24.3887	20.38	19.22	94.3081	78.9668	45.6746	8.87491	142.267	1447.78	1818.06	13753.9	11665.1	270.739	59.363
VC_Y16	2016	IL	3B	EXP	63457.8	0.966102	61306.7	0.346644	21.9973	24.197	19.64	18.84	95.9267	78.8444	43.0125	8.34021	131.429	1360.56	1803.78	12925.3	10846.1	275.407	56.2283
VC_Y16	2016	IL	4A	EXP	68835.6	0.859375	59155.6	0.278031	19.1384	21.0523	19.74	17.26	87.4367	78.9054	44.6234	7.50635	109.048	1224.53	1569.35	11633	9764.91	298.746	58.166
VC_Y16	2016	IL	4B	EXP	79591.1	0.810811	64533.3	0.253973	20.214	22.2354	19.42	17.5	90.1133	79.145	44.7019	7.85193	98.6533	1280.9	1657.55	12168.6	10165.6	345.425	57.6064
VC_Y16	2016	IL	5A	EXP	93573.3	0.678161	63457.8	0.167425	15.6665	17.2332	18.54	15.66	84.466	80.7229	41.8852	5.27066	56.3265	859.813	1284.66	8168.23	6477.46	406.108	49.8929
VC_Y16	2016	IL	5B	EXP	98951.1	0.663043	65608.9	0.183391	18.1468	19.9615	19.32	16.34	84.5756	78.7903	44.1933	7.08727	71.624	1156.16	1488.04	10983.5	9066.05	429.448	57.9197
VC_Y16	2016	IL	6A	EXP	45173.3	1	45173.3	0.374905	16.9357	18.6293	19.48	18.32	94.0452	79.77	40.2803	5.75017	127.291	938.037	1388.73	8911.35	7326.57	196.052	50.3529
VC_Y16	2016	IL	6B	EXP	53777.8	0.98	52702.2	0.34632	18.6243	20.4868	19.52	17.46	89.4467	78.6242	45.5008	7.54763	140.349	1231.26	1527.19	11697	9936.39	233.396	60.1004
VC_Y16	2016	IL	7A	EXP	109707	0.558824	61306.7	0.150314	16.4904	18.1395	19.66	17.26	87.7925	78.3124	42.92	6.39575	58.2986	1043.35	1352.21	9911.85	8083.5	476.127	57.5184
VC_Y16	2016	IL	7B	EXP	86044.4	0.6625	57004.4	0.20695	17.8069	19.5876	19.86	18.36	92.4471	79.6542	44.3677	6.69757	77.8386	1092.59	1460.17	10379.6	8546	373.433	55.7797
VC_Y16	2016	IL	8A	EXP	70986.7	0.939394	66684.4	0.347394	24.6603	27.1264	19.42	17.84	91.8641	78.6462	42.8423	9.40018	132.422	1533.47	2022.15	14568	12237.7	308.082	56.5306
VC_Y16	2016	IL	8B	EXP	67760	0.904762	61306.7	0.308825	20.926	23.0186	19.36	17.98	92.8719	78.777	44.0759	8.15611	120.368	1330.52	1715.93	12640	10630	294.078	57.8021
VC_Y16	2016	IL	9A	EXP	84968.9	0.898734	76364.4	0.269519	22.9007	25.1908	19.64	17.4	88.5947	79.0224	45.6606	9.13975	107.566	1490.99	1877.86	14164.4	11917.7	368.765	59.1877
VC_Y16	2016	IL	9B	EXP	77440	0.805556	62382.2	0.289083	22.3866	24.6253	20.34	19.08	93.8053	78.9453	42.6826	8.38257	108.246	1367.47	1835.7	12990.9	10819.1	336.09	55.531
VC_Y16	2016	IL	10A	EXP	91422.2	0.858824	78515.6	0.255459	23.3546	25.6901	19.56	17.26	88.2413	78.6186	44.3741	9.23269	100.99	1506.15	1915.08	14308.4	11996.6	396.772	58.6276
VC_Y16	2016	IL	10B	EXP	93573.3	0.862069	80666.7	0.267747	25.054	27.5594	18.8	16.44	87.4468	79.0224	44.4279	9.72917	103.974	1587.14	2054.43	15077.8	12617.3	406.108	57.5898
FF_Y16	2016	IL	1A	EXP	92497.8	0.895349	82817.8	0.211535	19.5665	21.5232	19	15.54	81.7895	77.8363	43.9265	7.93726	85.8103	1294.82	1604.45	12300.8	10294.9	401.44	60.1595
FF_Y16	2016	IL	1B	EXP	96262.2	0.949721	91422.2	0.265743	25.581	28.1391	19.5	16.12	82.6667	77.5164	47.1971	11.3106	117.498	1845.13	2097.64	17528.7	15013.3	417.778	65.5716
FF_Y16	2016	IL	2A	EXP	81204.4	1.07285	87120	0.299656	24.3334	26.7667	19	16.16	85.0526	77.5693	43.65	9.92697	122.247	1619.41	1995.34	15384.4	13036.6	352.427	60.5008
FF_Y16	2016	IL	2B	EXP	79053.3	1.19728	94648.9	0.34068	26.9319	29.6251	18.66	15.76	84.4587	77.5494	48.6746	12.2627	155.119	2000.44	2208.42	19004.2	16452.7	343.091	67.5252
FF_Y16	2016	IL	3A	EXP	57004.4	1.18868	67760	0.382	21.7757	23.9533	20.5	17.52	85.4634	78.8329	43.4038	8.33585	146.232	1359.85	1785.61	12918.5	10885.5	247.399	56.7708
FF_Y16	2016	IL	3B	EXP	55391.1	1.2233	67760	0.40532	22.4511	24.6963	19.52	16.56	84.8361	78.5145	43.8158	8.80649	158.987	1436.62	1840.99	13647.9	11566.5	240.397	58.1716
FF_Y16	2016	IL	4A	EXP	39795.6	1.21622	48400	0.478919	19.0588	20.9647	19.24	17.66	91.7879	77.6792	44.7885	7.93892	199.493	1295.09	1562.83	12303.4	10567.8	172.713	61.7749
FF_Y16	2016	IL	4B	EXP	43022.2	1.35	58080	0.4851	20.8701	22.9571	19.08	17.26	90.4612	78.4853	44.406	8.30787	193.106	1355.28	1711.35	12875.2	10977.1	186.716	59.0354
FF_Y16	2016	IL	5A	EXP	71524.4	0.962406	68835.6	0.314586	22.5006	24.7507	18.32	15	81.8777	77.6959	47.0181	9.83181	137.461	1603.88	1845.05	15236.9	13081.4	310.416	64.8016
FF_Y16	2016	IL	5B	EXP	69373.3	1.14729	79591.1	0.35386	24.5485	27.0033	17.9	15.42	86.1453	78.9369	46.5977	10.0392	144.713	1637.72	2012.98	15558.4	13244.3	301.08	60.6489
FF_Y16	2016	IL	6A	EXP	84431.1	0.89172	75288.9	0.253172	21.3756	23.5132	18.58	14.64	78.7944	78.2045	46.6844	9.06245	107.335	1478.38	1752.8	14044.6	11925.3	366.431	62.8745
FF_Y16	2016	IL	6B	EXP	90346.7	0.916667	82817.8	0.253714	22.9222	25.2145	19.02	13.4	70.4522	77.5673	44.3599	9.50426	105.198	1550.45	1879.62	14729.3	12457.6	392.105	61.4905
FF_Y16	2016	IL	7A	EXP	73137.8	1.07353	78515.6	0.304235	22.2511	24.4762	18.2	15.24	83.7363	77.0363	45.3832	9.66222	132.11	1576.22	1824.59	14974.1	12832.1	317.418	64.398
FF_Y16	2016	IL	7B	EXP	71524.4	1.20301	86044.4	0.367759	26.3038	28.9342	19.52	16.98	86.9877	76.8771	49.005	12.4191	173.634	2025.95	2156.91	19246.6	16779.2	310.416	70.0195
FF_Y16	2016	IL	8A	EXP	107018	0.582915	62382.2	0.153005	16.3743	18.0117	18.6	14	75.2688	76.9638	46.2778	7.27334	67.9638	1186.52	1342.69	11271.9	9464.75	464.457	65.8748
FF_Y16	2016	IL	8B	EXP	93035.6	0.763006	70986.7	0.197017	18.3296	20.1626	19.04	14.8	77.7311	77.2927	47.2241	8.18978	88.0285	1336.02	1503.03	12692.2	10785.4	403.774	66.2622
FF_Y16	2016	IL	9A	EXP	62382.2	1.10345	68835.6	0.371034	23.146	25.4606	20.46	17.72	86.608	76.6427	49.2913	11.1034	177.99	1811.32	1897.97	17207.6	15038.9	270.739	71.1423
FF_Y16	2016	IL	9B	EXP	61844.4	1.14783	70986.7	0.406957	25.168	27.6848	20.56	18.56	90.2724	77.7422	47.8796	11.1756	180.705	1823.1	2063.78	17319.4	14987.2	268.405	65.8519
FF_Y16	2016	IL	10A	EXP	50551.1	1.29787	65608.9	0.463745	23.4428	25.7871	19.96	18.64	93.3868	77.8211	49.0271	10.6212	210.109	1732.66	1922.31	16460.3	14318.6	219.392	67.1911
FF_Y16	2016	IL	10B	EXP	51088.9	1.24211	63457.8	0.443411	22.6534	24.9187	20.04	17.82	88.9222	78.3345	46.0976	9.42689	184.519	1537.83	1857.57	14609.4	12530.1	221.726	61.7139
AIR_F16	2016	WI	1A	EXP	81742.2	0.842105	68835.6	0.297237	24.2968	26.7265	21	19.32	92	79.3364	44.1136	9.22819	112.894	1505.41	1992.34	14301.4	11954.3	354.761	56.3267
AIR_F16	2016	WI	1B	EXP	76364.4	0.84507	64533.3	0.304732	23.2707	25.5978	20.04	18.76	93.6128	80.9842	45.6362	8.41438	110.187	1372.66	1908.2	13040.2	10800.6	331.422	53.624
AIR_F16	2016	WI	2A	EXP	51626.7	1	51626.7	0.411083	21.2229	23.3451	19.96	18.88	94.5892	79.04	44.8347	8.30995	160.962	1355.62	1740.27	12878.4	10914.1	224.06	58.0686
AIR_F16	2016	WI	2B	EXP	60231.1	0.946429	57004.4	0.36575	22.0295	24.2325	20.5	19.4	94.6341	77.0421	46.0968	9.71396	161.278	1584.66	1806.42	15054.3	12986.4	261.403	65.394
AIR_F16	2016	WI	3A	EXP	66684.4	0.967742	64533.3	0.368839	24.5958	27.0554	20.1	19	94.5274	79.2457	46.7794	9.94978	149.207	1623.13	2016.86	15419.7	13113.5	289.41	59.9928
AIR_F16	2016	WI	3B	EXP	69911.1	0.907692	63457.8	0.327477	22.8943	25.1837	20.14	18.88	93.7438	77.0006	47.2622	10.3692	148.32	1691.55	1877.33	16069.8	13889	303.414	67.1686
AIR_F16	2016	WI	4A	EXP	78515.6	0.821918	64533.3	0.309726	24.3183	26.7501	20.72	19.14	92.3745	79.0062	47.8083	10.1699	129.527	1659.04	1994.1	15760.9	13426	340.758	62.0198
AIR_F16	2016	WI	4B	EXP	77440	0.847222	65608.9	0.312	24.1613	26.5774	19.6	17.74	90.5102	75.0873	45.5356	11.4204	147.474	1863.03	1981.22	17698.8	15381.5	336.09	70.0982
AIR_F16	2016	WI	5A	EXP	58080	1	58080	0.38163	22.165	24.3816	20.12	18.46	91.7495	77.8343	43.8119	8.96871	154.42	1463.09	1817.53	13899.3	11829.7	252.067	60.0079
AIR_F16	2016	WI	5B	EXP	62382.2	1.05172	65608.9	0.375241	23.4084	25.7492	19.98	18.38	91.992	79.3468	46.6159	9.39033	150.529	1531.86	1919.49	14552.7	12362.5	270.739	59.4916
AIR_F16	2016	WI	6A	EXP	86044.4	0.85	73137.8	0.276425	23.7848	26.1633	20.74	19.46	93.8284	78.1609	44.3556	9.6	111.57	1566.07	1950.36	14877.7	12553.9	373.433	59.8574
AIR_F16	2016	WI	6B	EXP	77440	0.833333	64533.3	0.281917	21.8316	24.0148	20.4	18.56	90.9804	79.1034	42.9094	8.15648	105.326	1330.58	1790.19	12640.5	10514.3	336.09	55.4068
AIR_F16	2016	WI	7A	EXP	51626.7	1	51626.7	0.37825	19.5278	21.4806	21.86	21.03	96.2031	78.9794	47.2676	8.08445	156.594	1318.83	1601.28	12528.9	10703.6	224.06	61.3966
AIR_F16	2016	WI	7B	EXP	45173.3	0.857143	38720	0.368381	16.641	18.3051	21.22	20.08	94.6277	79.5189	43.9089	6.23553	138.036	1017.22	1364.56	9663.55	8102.93	196.052	55.5701
AIR_F16	2016	WI	8A	EXP	97875.6	0.791209	77440	0.20978	20.5324	22.5856	19.04	16.96	89.0756	80.1938	44.5504	7.54885	77.1271	1231.46	1683.65	11698.9	9590.44	424.78	54.5242
AIR_F16	2016	WI	8B	EXP	104329	0.463918	48400	0.120907	12.6141	13.8755	17.52	14.88	84.9315	79.4864	45.5168	4.90748	47.0386	800.568	1034.36	7605.4	6118.25	452.787	57.6964
AIR_F16	2016	WI	9A	EXP	97875.6	0.791209	77440	0.233055	22.8104	25.0914	19.28	17.94	93.0498	79.8782	47.8281	9.14687	93.454	1492.15	1870.45	14175.4	11880.2	424.78	59.4684
AIR_F16	2016	WI	9B	EXP	104329	0.463918	48400	0.130433	13.6079	14.9687	20.12	18.14	90.159	80.8702	43.3359	4.70045	45.0542	766.795	1115.85	7284.55	5715.91	452.787	51.2265
AIR_F16	2016	WI	10A	EXP	39795.6	1.2973	51626.7	0.514432	20.4721	22.5193	21.08	20.3	96.2998	80.6082	44.58	7.37413	185.3	1202.96	1678.71	11428.1	9576.67	172.713	53.4189
AIR_F16	2016	WI	10B	EXP	49475.6	0.913043	45173.3	0.393261	19.4568	21.4025	21.76	20.48	94.1176	79.2745	46.4837	7.81026	157.861	1274.1	1595.46	12104	10293.8	214.724	59.5307
AIR_F16	2016	WI	11A	GRW	55928.9	1.05769	59155.6	0.393731	22.0209	24.223	20.34	18.94	93.117	79.0863	47.7358	9.16009	163.781	1494.3	1805.72	14195.9	12147.4	242.731	61.6894
AIR_F16	2016	WI	11B	GRW	57004.4	1.03774	59155.6	0.411094	23.4342	25.7776	20.14	18.74	93.0487	78.5636	45.4378	9.51061	166.84	1551.49	1921.6	14739.1	12570.1	247.399	60.1873
AIR_F16	2016	WI	11C	GRW	59155.6	0.945455	55928.9	0.402764	23.8257	26.2083	21.5	20.2	93.9535	79.8742	43.974	8.78584	148.521	1433.25	1953.71	13615.9	11405.5	256.735	54.6871
HOFS_Y16	2016	MN	1A	EXP	68835.6	0.90625	62382.2	0.327406	22.5372	24.7909	20.26	18.64	92.0039	77.6278	38.9059	8.17357	118.741	1333.37	1848.05	12667	10520.2	298.746	53.7847
HOFS_Y16	2016	MN	1B	EXP	69911.1	0.923077	64533.3	0.326738	22.8426	25.1269	20	18.38	91.9	78.3518	40.6287	8.37122	119.741	1365.62	1873.1	12973.3	10796.8	303.414	54.3487
HOFS_Y16	2016	MN	2A	EXP	83893.3	0.74359	62382.2	0.242667	20.3581	22.3939	19.28	17.54	90.9751	77.9457	35.0584	6.55862	78.1781	1069.92	1669.37	10164.3	8130.79	364.097	47.7773
HOFS_Y16	2016	MN	2B	EXP	82817.8	0.831169	68835.6	0.262857	21.7692	23.9462	19.18	18.08	94.2649	79.1491	37.3231	7.05886	85.2337	1151.53	1785.08	10939.5	8795	359.429	48.0882
HOFS_Y16	2016	MN	3A	EXP	90346.7	0.714286	64533.3	0.22381	20.2204	22.2425	20.84	19.1	91.6507	80.4868	34.9334	5.74313	63.5677	936.889	1658.08	8900.44	6850.26	392.105	42.1216
HOFS_Y16	2016	MN	3B	EXP	96800	0.7	67760	0.207956	20.1301	22.1431	18.68	17.34	92.8266	78.0379	36.7011	6.76063	69.8412	1102.88	1650.67	10477.3	8406.54	420.112	49.8067
HOFS_Y16	2016	MN	4A	EXP	49475.6	0.978261	48400	0.40387	19.9817	21.9798	20.4	18.36	90	78.6181	37.5369	6.68229	135.062	1090.1	1638.5	10355.9	8502.69	214.724	49.5953
HOFS_Y16	2016	MN	4B	EXP	50551.1	0.978723	49475.6	0.367362	18.5705	20.4276	20.14	19.12	94.9355	79.0711	37.4072	6.05778	119.835	988.219	1522.78	9388.08	7645.9	219.392	48.3766
HOFS_Y16	2016	MN	5A	EXP	96800	0.433333	41946.7	0.124156	12.0183	13.2201	18.42	17.04	92.5081	78.6657	38.7479	4.13958	42.7642	675.298	985.497	6415.33	5009.72	420.112	51.0812
HOFS_Y16	2016	MN	5B	EXP	96800	0.466667	45173.3	0.120933	11.7063	12.877	18.88	17.66	93.5381	80.263	36.0211	3.46775	35.8238	565.701	959.92	5374.16	3994.13	420.112	43.9312
HOFS_Y16	2016	MN	6A	EXP	38720	0.972222	37644.4	0.396667	15.3589	16.8948	19.68	18.62	94.6138	79.5831	35.7446	4.67037	120.619	761.887	1259.43	7237.92	5810.45	168.045	45.0959
HOFS_Y16	2016	MN	6B	EXP	45173.3	1	45173.3	0.38219	17.2648	18.9913	20.78	19.44	93.5515	78.2112	40.4925	6.34686	140.5	1035.38	1415.72	9836.08	8224.31	196.052	54.5185
HOFS_Y16	2016	MN	7A	EXP	104329	0.546392	57004.4	0.143629	14.9846	16.4831	18.28	16.02	87.6368	80.9764	33.4535	3.97347	38.086	648.201	1228.74	6157.91	4476.38	452.787	39.3252
HOFS_Y16	2016	MN	7B	EXP	93573.3	0.367816	34417.8	0.0947586	8.86688	9.75357	18.88	17.52	92.7966	82.2312	33.5316	2.20127	23.5245	359.097	727.084	3411.42	2278.23	406.108	36.817
HOFS_Y16	2016	MN	8A	EXP	76364.4	0.873239	66684.4	0.30231	23.0857	25.3943	19.88	18.54	93.2596	79.5863	35.3452	6.9404	90.8853	1132.2	1893.03	10755.9	8531.47	331.422	44.5849
HOFS_Y16	2016	MN	8B	EXP	73137.8	0.852941	62382.2	0.252735	18.4845	20.3329	19.3	18.1	93.7824	79.9422	34.2826	5.29607	72.4123	863.959	1515.73	8207.61	6374.47	317.418	42.4906
HOFS_Y16	2016	MN	9A	EXP	55928.9	0.961538	53777.8	0.378885	21.1906	23.3097	20.84	19.64	94.2418	79.7033	37.5136	6.72273	120.201	1096.69	1737.63	10418.6	8438.22	242.731	47.0489
HOFS_Y16	2016	MN	9B	EXP	59155.6	1.05455	62382.2	0.386727	22.8771	25.1648	20.26	19.22	94.8667	80.6262	40.936	7.55978	127.795	1233.24	1875.92	11715.8	9583.16	256.735	49.0068
HOFS_Y16	2016	MN	10A	EXP	54853.3	1.09804	60231.1	0.418	22.9287	25.2216	20.12	18.76	93.2406	78.6521	40.0243	8.16295	148.814	1331.64	1880.15	12650.6	10532.4	238.063	52.7976
HOFS_Y16	2016	MN	10B	EXP	50551.1	1.04255	52702.2	0.428213	21.6466	23.8113	21.14	19.96	94.4182	80.505	35.8179	6.29799	124.587	1027.4	1775.02	9760.35	7765.93	219.392	43.1478
HOFS_Y16	2016	MN	11A	GRW	55928.9	1	55928.9	0.400692	22.4103	24.6513	20.84	19.86	95.2975	79.5083	39.6837	7.59323	135.766	1238.7	1837.64	11767.6	9687.27	242.731	50.2489
HOFS_Y16	2016	MN	11B	GRW	59155.6	0.981818	58080	0.370836	21.937	24.1307	19.26	18.06	93.7695	79.8641	39.8104	7.32713	123.862	1195.29	1798.84	11355.3	9299.69	256.735	49.534
HOFS_Y16	2016	MN	11C	GRW	50551.1	1.10638	55928.9	0.458553	23.1804	25.4984	20.26	19.38	95.6565	78.9092	39.9473	8.13748	160.975	1327.48	1900.79	12611.1	10490.9	219.392	52.0614
P15_Y16	2016	WI	1A	EXP	90346.7	0.785714	70986.7	0.241524	21.8209	24.003	19.24	17.48	90.8524	75.6762	53.022	11.726	129.788	1912.88	1789.31	18172.4	15990.9	392.105	79.6935
P15_Y16	2016	WI	1B	EXP	91422.2	0.894118	81742.2	0.248918	22.7566	25.0323	18.68	16.84	90.1499	77.3641	51.1435	10.977	120.069	1790.7	1866.04	17011.7	14748.9	396.772	71.5358
P15_Y16	2016	WI	2A	EXP	74213.3	0.826087	61306.7	0.275913	20.4764	22.5241	19.82	18.46	93.1382	77.9899	48.9012	9.18301	123.738	1498.04	1679.07	14231.4	12230.3	322.086	66.5086
P15_Y16	2016	WI	2B	EXP	77440	0.847222	65608.9	0.27175	21.0443	23.1488	18.48	16.46	89.0693	80.488	45.4638	7.77839	100.444	1268.91	1725.63	12054.6	9992.88	336.09	54.8153
P15_Y16	2016	WI	3A	EXP	107556	0.74	79591.1	0.2056	22.1134	24.3248	18.22	16.3	89.4621	78.8247	48.5046	9.46361	87.9881	1543.82	1813.3	14666.3	12386.2	466.791	63.467
P15_Y16	2016	WI	3B	EXP	96800	0.788889	76364.4	0.231044	22.3651	24.6016	18.16	16.24	89.4273	76.3497	48.271	10.6386	109.903	1735.49	1833.94	16487.2	14233.1	420.112	70.5439
P15_Y16	2016	WI	4A	EXP	63457.8	0.949153	60231.1	0.363695	23.0793	25.3872	20.26	19	93.7808	77.7645	50.8302	10.8688	171.275	1773.04	1892.5	16843.9	14676	275.407	69.8401
P15_Y16	2016	WI	4B	EXP	67760	1.01587	68835.6	0.366254	24.8174	27.2991	18.74	17.4	92.8495	77.7733	49.6255	11.4057	168.326	1860.64	2035.02	17676.1	15347	294.078	68.1577
P15_Y16	2016	WI	5A	EXP	60231.1	0.964286	58080	0.421571	25.3917	27.9309	19.24	18.4	95.6341	77.4741	55.5744	13.2446	219.896	2160.62	2082.12	20525.9	18182.4	261.403	77.3559
P15_Y16	2016	WI	5B	EXP	61306.7	0.947368	58080	0.376316	23.0707	25.3777	19.14	17.86	93.3124	77.2351	54.9538	12.0258	196.157	1961.79	1891.79	18637	16479.1	266.071	77.3035
P15_Y16	2016	WI	6A	EXP	37644.4	1.11429	41946.7	0.512	19.274	21.2014	21.3	20.04	94.0845	78.363	51.8277	9.0057	239.231	1469.12	1580.46	13956.6	12212.8	163.377	69.2937
P15_Y16	2016	WI	6B	EXP	44097.8	1.02439	45173.3	0.481805	21.2465	23.3712	20.48	19.28	94.1406	77.9251	51.4293	10.0505	227.913	1639.56	1742.22	15575.8	13642.2	191.384	70.1529
P15_Y16	2016	WI	7A	EXP	87120	0.802469	69911.1	0.252049	21.9585	24.1544	18.66	16.62	89.0675	78.0632	48.1	9.6541	110.814	1574.89	1800.6	14961.5	12782.8	378.101	65.2011
P15_Y16	2016	WI	7B	EXP	83893.3	0.910256	76364.4	0.277333	23.2664	25.5931	19.4	17.3	89.1753	77.9815	53.1568	11.3466	135.25	1850.99	1907.85	17584.4	15312.5	364.097	72.324
P15_Y16	2016	WI	8A	EXP	39795.6	1.13514	45173.3	0.54373	21.638	23.8018	20.36	18.94	93.0255	78.3315	50.3654	9.83936	247.248	1605.12	1774.32	15248.6	13301.6	172.713	67.4367
P15_Y16	2016	WI	8B	EXP	49475.6	0.956522	47324.4	0.426043	21.0787	23.1866	20.36	19.26	94.5972	78.0267	53.2192	10.2706	207.59	1675.47	1728.46	15917	13973.8	214.724	72.2603
P15_Y16	2016	WI	9A	EXP	79591.1	0.918919	73137.8	0.324568	25.8327	28.416	19	17.22	90.6316	77.9524	49.9055	11.8431	148.8	1932	2118.28	18354	15890.3	345.425	67.9899
P15_Y16	2016	WI	9B	EXP	73137.8	0.955882	69911.1	0.318353	23.2836	25.612	19.64	18.4	93.6864	77.2487	52.4857	11.5848	158.396	1889.85	1909.26	17953.6	15726.9	317.418	73.7876
P15_Y16	2016	WI	10A	EXP	54853.3	0.980392	53777.8	0.405647	22.2511	24.4762	19.76	18.6	94.1296	78.168	50.7877	10.28	187.408	1676.99	1824.59	15931.4	13868.8	238.063	68.5152
P15_Y16	2016	WI	10B	EXP	40871.1	1.21053	49475.6	0.524789	21.4487	23.5936	20.58	19.34	93.9747	78.7664	51.1834	9.71279	237.644	1584.47	1758.8	15052.5	13116.3	177.381	67.1567
P15_Y16	2016	WI	11A	GRW	51626.7	1.02083	52702.2	0.4145	21.3993	23.5392	20.52	19.34	94.2495	76.9991	55.7304	11.4294	221.386	1864.51	1754.74	17712.8	15734	224.06	79.2086
P15_Y16	2016	WI	11B	GRW	60231.1	0.982143	59155.6	0.411071	24.7593	27.2352	19.9	18.86	94.7739	78.0325	57.3415	12.995	215.752	2119.9	2030.26	20139.1	17847.4	261.403	77.8369
P15_Y16	2016	WI	11C	GRW	59155.6	0.981818	58080	0.418945	24.783	27.2612	20.36	19.2	94.3026	78.3824	53.3813	11.9162	201.438	1943.91	2032.2	18467.2	16178.3	256.735	71.3069
TIMM_Y16	2016	WI	1A	EXP	41946.7	1.30769	54853.3	0.553949	23.2363	25.5599	18.12	17.2	94.9227	79.9422	49.2823	9.57041	228.157	1561.24	1905.38	14831.8	12744.4	182.049	61.0816
TIMM_Y16	2016	WI	1B	EXP	46248.9	1.2093	55928.9	0.523442	24.2086	26.6295	21	20.22	96.2857	80.3575	52.8193	10.4652	226.28	1707.21	1985.11	16218.5	14032.7	200.72	64.1099
TIMM_Y16	2016	WI	2A	EXP	66684.4	0.983871	65608.9	0.406065	27.0782	29.786	18.82	17.12	90.9671	79.1771	52.7106	12.3836	185.705	2020.17	2220.41	19191.6	16681.8	289.41	67.8228
TIMM_Y16	2016	WI	2B	EXP	69911.1	0.953846	66684.4	0.388985	27.1943	29.9138	20.18	19	94.1526	80.2098	55.2652	12.3928	177.265	2021.67	2229.94	19205.8	16672.5	303.414	67.5831
TIMM_Y16	2016	WI	3A	EXP	51626.7	1.04167	53777.8	0.490792	25.3379	27.8717	20.16	18.84	93.4524	79.8028	50.8431	10.8414	209.996	1768.58	2077.71	16801.5	14499.7	224.06	63.4541
TIMM_Y16	2016	WI	3B	EXP	58080	0.851852	49475.6	0.420667	24.4323	26.8756	21.18	19.82	93.5788	80.0993	52.3307	10.6018	182.537	1729.49	2003.45	16430.2	14174.6	252.067	64.3518
TIMM_Y16	2016	WI	4A	EXP	106480	0.848485	90346.7	0.25604	27.2632	29.9895	17.4	16	91.954	78.9787	51.7894	12.367	116.144	2017.46	2235.58	19165.9	16468.2	462.123	67.2723
TIMM_Y16	2016	WI	4B	EXP	96800	0.955556	92497.8	0.305378	29.5606	32.5166	18.4	16.78	91.1957	79.1055	52.4413	13.4961	139.422	2201.64	2423.97	20915.6	18071.5	420.112	67.7081
TIMM_Y16	2016	WI	5A	EXP	69911.1	0.984615	68835.6	0.367077	25.6628	28.229	17.8	16.1	90.4494	78.2752	50.1626	11.6527	166.679	1900.94	2104.35	18058.9	15651.1	303.414	67.3398
TIMM_Y16	2016	WI	5B	EXP	77440	0.916667	70986.7	0.353444	27.3707	30.1078	19.98	18.94	94.7948	78.9786	51.9846	12.4627	160.934	2033.07	2244.4	19314.2	16733.7	336.09	67.5263
TIMM_Y16	2016	WI	6A	EXP	97875.6	0.956044	93573.3	0.303516	29.7068	32.6775	18.34	16.26	88.6587	77.0044	51.7564	14.7317	150.515	2403.22	2435.96	22830.6	19969.9	424.78	73.5435
TIMM_Y16	2016	WI	6B	EXP	95724.4	0.966292	92497.8	0.317101	30.3543	33.3898	18.78	16.78	89.3504	77.8964	53.3399	14.9116	155.776	2432.56	2489.05	23109.3	20204.8	415.444	72.8535
TIMM_Y16	2016	WI	7A	EXP	79591.1	0.959459	76364.4	0.366081	29.1368	32.0505	19.38	18.1	93.3953	78.5209	52.2107	13.6147	171.057	2220.99	2389.22	21099.4	18364.7	345.425	69.2965
TIMM_Y16	2016	WI	7B	EXP	83893.3	0.897436	75288.9	0.328564	27.5643	30.3208	18.78	16.92	90.0958	78.8254	52.6086	12.7941	152.504	2087.12	2260.28	19827.7	17203.3	364.097	68.8347
TIMM_Y16	2016	WI	8A	EXP	68835.6	1.01562	69911.1	0.425844	29.3132	32.2445	19.04	18.16	95.3782	78.7894	52.4601	13.5905	197.434	2217.04	2403.68	21061.9	18359.5	298.746	68.7572
TIMM_Y16	2016	WI	8B	EXP	70986.7	0.984848	69911.1	0.388212	27.5579	30.3137	19.86	18.42	92.7492	76.395	52.294	14.174	199.671	2312.23	2259.75	21966.2	19398.3	308.082	76.2767
TIMM_Y16	2016	WI	9A	EXP	73137.8	0.941176	68835.6	0.389	28.4506	31.2957	20.84	20.08	96.3532	77.3924	51.6318	13.8373	189.195	2257.31	2332.95	21444.4	18794	317.418	72.1284
TIMM_Y16	2016	WI	9B	EXP	77440	0.916667	70986.7	0.360667	27.93	30.723	19.38	18.14	93.6017	77.4718	52.022	13.6387	176.12	2224.92	2290.26	21136.7	18510.4	336.09	72.4185
TIMM_Y16	2016	WI	10A	EXP	95724.4	0.932584	89271.1	0.311663	29.8338	32.8171	18.44	16.88	91.5401	78.6592	53.3582	14.155	147.872	2309.13	2446.37	21936.7	19074.9	415.444	70.3635
TIMM_Y16	2016	WI	10B	EXP	93573.3	0.885057	82817.8	0.309172	28.9303	31.8233	17.64	16.46	93.3107	78.6183	52.5966	13.5563	144.874	2211.47	2372.28	21009	18230.6	406.108	69.4921
TIMM_Y16	2016	WI	11A	GRW	57004.4	1.03774	59155.6	0.46166	26.3167	28.9484	20.2	19.22	95.1485	77.5406	51.8434	12.7676	223.976	2082.81	2157.97	19786.7	17381.4	247.399	71.9492
TIMM_Y16	2016	WI	11B	GRW	65608.9	0.901639	59155.6	0.39518	25.9273	28.5201	19.3	18.54	96.0622	78.0109	51.2952	12.1851	185.724	1987.79	2126.04	18884	16473.2	284.743	69.6978
TIMM_Y16	2016	WI	11C	GRW	54853.3	1.09804	60231.1	0.475922	26.1059	28.7165	18.9	18.42	97.4603	77.9245	51.432	12.3501	225.148	2014.7	2140.68	19139.6	16760.9	238.063	70.1583
M11_Y17	2017	IL	1A	EXP	94648.9	0.375	35493.3	0.190625	18.0424	19.8467	18.68	17.4	93.1478	78.0566	48.5044	8.00146	84.5384	1305.3	1479.48	12400.3	10510.1	410.776	65.769
M11_Y17	2017	IL	1B	EXP	101102	0.62766	63457.8	0.0870638	8.80235	9.68258	15.26	13.84	90.6946	79.8292	45.7414	3.38392	33.4703	552.026	721.792	5244.25	4083.67	438.784	57.0123
M11_Y17	2017	IL	2A	EXP	78515.6	0.684932	53777.8	0.238301	18.7104	20.5814	18.22	15.94	87.4863	77.3024	48.1394	8.51826	108.491	1389.6	1534.25	13201.2	11326.2	340.758	67.5173
M11_Y17	2017	IL	2B	EXP	92497.8	0.697674	64533.3	0.185419	17.1508	18.8659	17.92	15.7	87.6116	77.8776	49.206	7.77899	84.0993	1269	1406.37	12055.5	10247.7	401.44	67.2645
M11_Y17	2017	IL	3A	EXP	68835.6	0.859375	59155.6	0.269125	18.5254	20.3779	19.12	18.1	94.6653	78.0219	49.8725	8.46072	122.912	1380.22	1519.08	13112.1	11294.2	298.746	67.731
M11_Y17	2017	IL	3B	EXP	53777.8	0.94	50551.1	0.32804	17.6413	19.4054	18.24	17.14	93.9693	78.2673	47.647	7.61143	141.535	1241.67	1446.58	11795.9	10115.9	233.396	63.9858
M11_Y17	2017	IL	4A	EXP	39795.6	1.18919	47324.4	0.403459	16.0559	17.6615	17.82	16.08	90.2357	77.9077	46.1115	6.81513	171.254	1111.77	1316.58	10561.8	9072.5	172.713	62.9487
M11_Y17	2017	IL	4B	EXP	46248.9	1	46248.9	0.39114	18.0898	19.8987	18.72	17.74	94.765	77.8144	48.4349	8.09938	175.126	1321.27	1483.36	12552.1	10868	200.72	66.3997
M11_Y17	2017	IL	5A	EXP	75288.9	0.471429	35493.3	0.121257	9.12932	10.0422	17.18	15.1	87.8929	78.3285	48.1066	3.9657	52.6732	646.934	748.604	6145.87	5070.51	326.754	64.4212
M11_Y17	2017	IL	5B	EXP	66684.4	0.83871	55928.9	0.280065	18.6759	20.5435	18.18	16.96	93.2893	77.4057	49.0442	8.623	129.311	1406.69	1531.43	13363.5	11542.7	289.41	68.4735
M11_Y17	2017	IL	6A	EXP	91422.2	0.611765	55928.9	0.163906	14.9846	16.4831	17.202	14.98	87.0829	78.5148	47.0034	6.30528	68.9688	1028.59	1228.74	9771.64	8146.13	396.772	62.4029
M11_Y17	2017	IL	6B	EXP	79591.1	0.324324	25813.3	0.0901351	7.17396	7.89135	17.32	16.34	94.3418	79.0133	47.1278	2.95644	37.1454	482.291	588.264	4581.76	3648.07	345.425	61.1164
M11_Y17	2017	IL	7A	EXP	70986.7	0.742424	52702.2	0.235303	16.7034	18.3737	17.3	16.64	96.185	78.039	46.4237	7.09553	99.9558	1157.51	1369.68	10996.3	9318.57	308.082	62.9981
M11_Y17	2017	IL	7B	EXP	75288.9	0.628571	47324.4	0.192286	14.477	15.9247	18.08	16.7	92.3673	77.0234	49.3666	6.84204	90.8772	1116.16	1187.11	10603.5	9089.62	326.754	70.0898
M11_Y17	2017	IL	8A	EXP	95724.4	0.629213	60231.1	0.164022	15.701	17.2711	16.86	15.14	89.7983	79.0165	46.3741	6.36601	66.5035	1038.5	1287.48	9865.76	8162.84	415.444	60.1296
M11_Y17	2017	IL	8B	EXP	83893.3	0.602564	50551.1	0.173872	14.5867	16.0454	17.4	16.22	93.2184	79.5624	45.9328	5.70555	68.0096	930.759	1196.11	8842.21	7282	364.097	58.008
M11_Y17	2017	IL	9A	EXP	58797	1.02439	60231.1	0.316293	18.5971	20.4568	17.98	16.62	92.436	79.3172	45.6448	7.31531	124.416	1193.36	1524.96	11336.9	9556.81	255.179	58.3358
M11_Y17	2017	IL	9B	EXP	62382.2	0.931034	58080	0.306345	19.1105	21.0215	17.76	17.22	96.9595	79.0872	47.262	7.87019	126.161	1283.88	1567.06	12196.9	10359.1	270.739	61.0746
M11_Y17	2017	IL	10A	EXP	51626.7	0.625	32266.7	0.17375	8.97013	9.86715	17.16	15.44	89.9767	79.8687	42.8997	3.22785	62.523	526.567	735.551	5002.38	4042.77	224.06	53.3656
M11_Y17	2017	IL	10B	EXP	51626.7	0.875	45173.3	0.312875	16.1527	17.768	18.86	18.16	96.2884	77.991	45.4616	6.73409	130.438	1098.55	1324.52	10436.2	8887.61	224.06	61.8273
VC_Y17	2017	IL	1A	EXP	47324.4	1.06818	50551.1	0.403818	19.1105	21.0215	19.48	17.62	90.4517	77.0701	43.3154	7.90871	167.117	1290.16	1567.06	12256.6	10484.1	205.388	61.3735
VC_Y17	2017	IL	1B	EXP	47324.4	1.20455	57004.4	0.468409	22.1672	24.3839	20.76	20.24	97.4952	75.175	46.0174	10.5514	222.96	1721.28	1817.71	16352.1	14329	205.388	70.5907
VC_Y17	2017	IL	2A	EXP	90346.7	0.869048	78515.6	0.260143	23.503	25.8533	19.7	17.34	88.0203	76.3324	43.6491	10.1168	111.978	1650.38	1927.25	15678.6	13359.2	392.105	63.8361
VC_Y17	2017	IL	2B	EXP	95724.4	0.842697	80666.7	0.246112	23.559	25.9149	18.84	17.76	94.2675	75.3223	43.0386	10.4257	108.914	1700.77	1931.84	16157.3	13810.1	415.444	65.6292
VC_Y17	2017	IL	3A	EXP	72062.2	0.910448	65608.9	0.324985	23.4191	25.7611	19.22	17.42	90.6348	76.4941	44.7397	10.262	142.404	1674.06	1920.37	15903.5	13670.4	312.75	64.9839
VC_Y17	2017	IL	3B	EXP	66684.4	0.870968	58080	0.31029	20.6915	22.7607	19.6	17.9	91.3265	75.8235	45.6153	9.50791	142.581	1551.05	1696.71	14734.9	12748.8	289.41	68.1458
VC_Y17	2017	IL	4A	EXP	80666.7	0.853333	68835.6	0.286453	23.1072	25.418	19.18	15.7	81.8561	76.9653	44.523	9.87423	122.408	1610.8	1894.79	15302.6	13057.8	350.093	63.3727
VC_Y17	2017	IL	4B	EXP	74213.3	0.927536	68835.6	0.313797	23.2879	25.6167	18.28	16.76	91.6849	75.2418	46.2445	11.1096	149.698	1812.34	1909.61	17217.2	14985.5	322.086	70.7482
VC_Y17	2017	IL	5A	EXP	101102	0.617021	62382.2	0.168723	17.0583	18.7641	18.54	15.06	81.2298	74.5407	44.3905	8.03268	79.4511	1310.39	1398.78	12448.7	10611.1	438.784	69.8347
VC_Y17	2017	IL	5B	EXP	97875.6	0.758242	74213.3	0.224923	22.0145	24.2159	19.34	15.48	80.0414	76.717	44.7146	9.54961	97.5689	1557.85	1805.19	14799.6	12569.6	424.78	64.3316
VC_Y17	2017	IL	6A	EXP	58080	1.05556	61306.7	0.395222	22.9545	25.25	19.56	18.76	95.91	76.4471	45.1912	10.1802	175.279	1660.71	1882.27	15776.8	13642.5	252.067	65.771
VC_Y17	2017	IL	6B	EXP	48400	0.933333	45173.3	0.359689	17.4089	19.1498	20.12	20.02	99.503	76.5176	42.7489	7.28165	150.447	1187.87	1427.53	11284.8	9647.18	210.056	62.0303
VC_Y17	2017	IL	7A	EXP	110782	0.601942	66684.4	0.17501	19.388	21.3268	19.32	16.18	83.7474	76.8669	43.4545	8.12061	73.3024	1324.73	1589.81	12585	10514.3	480.795	62.1159
VC_Y17	2017	IL	7B	EXP	122613	0.605263	74213.3	0.160807	19.7171	21.6888	18.28	15.4	84.2451	75.7937	46.8989	9.32658	76.065	1521.47	1616.8	14453.9	12305	532.142	70.1498
VC_Y17	2017	IL	8A	EXP	65608.9	0.983607	64533.3	0.352754	23.1438	25.4582	20.12	18.92	94.0358	77.5822	43.3267	9.36636	142.761	1527.95	1897.79	14515.6	12333	284.743	60.0182
VC_Y17	2017	IL	8B	EXP	75288.9	0.914286	68835.6	0.306771	23.0965	25.4061	18.88	18.62	98.6229	75.1025	45.8916	10.9957	146.047	1793.75	1893.91	17040.7	14820	326.754	70.6032
VC_Y17	2017	IL	9A	EXP	86044.4	0.8125	69911.1	0.2542	21.8725	24.0597	19.7	16.98	86.1929	74.795	45.0188	10.3411	120.183	1686.97	1793.54	16026.2	13859.2	373.433	70.1157
VC_Y17	2017	IL	9B	EXP	87120	0.790123	68835.6	0.246716	21.4939	23.6433	18.22	15.84	86.9374	75.3646	46.1736	10.1872	116.933	1661.87	1762.5	15787.7	13647.1	378.101	70.2891
VC_Y17	2017	IL	10A	EXP	92497.8	0.674419	62382.2	0.198651	18.3748	20.2123	17.48	14.18	81.1213	75.0799	51.152	9.7594	105.51	1592.07	1506.73	15124.7	13216.5	401.44	78.7676
VC_Y17	2017	IL	10B	EXP	97875.6	0.692308	67760	0.193495	18.9384	20.8322	18.98	17.06	89.8841	76.2424	43.2004	8.09884	82.7463	1321.18	1552.95	12551.2	10573.5	424.78	63.4201
MD_Y17	2017	IL	1A	EXP	60231.1	0.964286	58080	0.3345	20.1473	22.162	18.44	18.42	99.8915	79.8143	38.1964	6.47249	107.461	1055.87	1652.08	10030.8	8117.3	261.403	47.6433
MD_Y17	2017	IL	1B	EXP	66684.4	0.935484	62382.2	0.354839	23.6622	26.0284	18.08	17.6	97.3451	79.1733	42.1256	8.64988	129.714	1411.07	1940.3	13405.2	11175.5	289.41	54.2127
MD_Y17	2017	IL	2A	EXP	66684.4	0.854839	57004.4	0.324774	21.6574	23.8231	18.72	18.46	98.6111	77.7989	44.5077	8.91672	133.715	1454.6	1775.91	13818.7	11753.4	289.41	61.0585
MD_Y17	2017	IL	2B	EXP	61306.7	0.894737	54853.3	0.352877	21.6337	23.7971	18.66	18.26	97.8564	75.914	45.6107	9.90267	161.527	1615.44	1773.97	15346.7	13306.7	266.071	67.8841
MD_Y17	2017	IL	3A	EXP	73137.8	0.867647	63457.8	0.304456	22.2672	24.4939	18.56	18.28	98.4914	79.8622	42.7103	7.97993	109.108	1301.78	1825.91	12366.9	10223.6	317.418	53.1472
MD_Y17	2017	IL	3B	EXP	66684.4	0.870968	58080	0.339	22.606	24.8666	18.82	18.32	97.3433	78.1653	46.1699	9.49553	142.395	1549.03	1853.69	14715.8	12572.6	289.41	62.2934
MD_Y17	2017	IL	4A	EXP	66684.4	0.983871	65608.9	0.359484	23.972	26.3692	17.42	17.18	98.6223	79.0721	42.3661	8.856	132.805	1444.7	1965.7	13724.6	11469.5	289.41	54.7874
MD_Y17	2017	IL	4B	EXP	89271.1	0.73494	65608.9	0.240916	21.5068	23.6575	18.32	17.94	97.9258	79.0746	44.7077	8.38339	93.9093	1367.6	1763.56	12992.2	10841.2	387.437	57.8083
MD_Y17	2017	IL	5A	EXP	66684.4	0.870968	58080	0.362484	24.172	26.5892	20.06	19.48	97.1087	76.4571	44.3936	10.5265	157.855	1717.21	1982.11	16313.5	14041.9	289.41	64.5827
MD_Y17	2017	IL	5B	EXP	73137.8	0.897059	65608.9	0.328235	24.0064	26.407	17.36	16.64	95.8525	77.5322	45.1148	10.139	138.628	1653.99	1968.52	15712.9	13427	317.418	62.6346
PL1_Y17	2017	WI	1A	EXP	40871.1	1.28947	52702.2	0.546105	22.3199	24.5519	17.88	17.76	99.3289	76.7285	48.7056	10.5411	257.91	1719.59	1830.23	16336.1	14328.4	177.381	70.0387
PL1_Y17	2017	WI	1B	EXP	44097.8	1.43902	63457.8	0.606634	26.7512	29.4263	18.64	18.52	99.3562	76.1816	46.6298	12.3796	280.732	2019.52	2193.6	19185.4	16800.4	191.384	68.6296
PL1_Y17	2017	WI	2A	EXP	69911.1	1.03077	72062.2	0.413169	28.8851	31.7736	18.2	17.82	97.9121	75.5698	50.7329	14.917	213.37	2433.43	2368.58	23117.6	20445.6	303.414	76.5866
PL1_Y17	2017	WI	2B	EXP	66684.4	0.983871	65608.9	0.438258	29.225	32.1475	18.64	18.3	98.176	76.4839	46.5981	13.3437	200.102	2176.79	2396.45	20679.5	17993.6	289.41	67.7125
PL1_Y17	2017	WI	3A	EXP	75288.9	0.971429	73137.8	0.373686	28.1344	30.9478	18.72	18.1	96.688	75.0634	49.6898	14.5255	192.93	2369.58	2307.02	22511	19877.2	326.754	76.5668
PL1_Y17	2017	WI	3B	EXP	77440	1.02778	79591.1	0.419028	32.4495	35.6945	19.32	19.24	99.5859	75.3044	45.9734	15.3505	198.225	2504.17	2660.86	23789.6	20792.6	336.09	70.1556
PL1_Y17	2017	WI	4A	EXP	95724.4	0.865169	82817.8	0.275034	26.3274	28.9602	17.82	16.4	92.0314	76.6439	47.9271	12.2794	128.279	2003.17	2158.85	19030.1	16455.8	415.444	69.1698
PL1_Y17	2017	WI	4B	EXP	92497.8	0.976744	90346.7	0.363233	33.5982	36.958	18.34	17.84	97.2737	76.7071	44.3321	14.456	156.285	2358.24	2755.05	22403.2	19246.7	401.44	63.8085
PL1_Y17	2017	WI	5A	EXP	54853.3	1.09804	60231.1	0.472745	25.9316	28.5248	19.26	18.5	96.054	78.8286	43.2932	9.9035	180.545	1615.58	2126.39	15348	12983.5	238.063	56.6377
PL1_Y17	2017	WI	5B	EXP	62382.2	1	62382.2	0.44231	27.5923	30.3515	19.42	19.3	99.3821	77.0519	43.9734	11.6015	185.974	1892.57	2262.57	17979.4	15446.1	270.739	62.3551
PL1_Y17	2017	WI	6A	EXP	47324.4	1.20455	57004.4	0.515727	24.4065	26.8472	19.84	19.84	100	76.4593	50.5042	12.0904	255.48	1972.34	2001.33	18737.2	16530.5	205.388	73.4654
PL1_Y17	2017	WI	6B	EXP	49475.6	1.28261	63457.8	0.553217	27.3707	30.1078	19.8	19.58	98.8889	77.458	44.778	11.5115	232.671	1877.9	2244.4	17840	15380.9	214.724	62.3724
PL1_Y17	2017	WI	7A	EXP	107556	0.83	89271.1	0.22456	24.1527	26.5679	16.54	14.56	88.029	79.1439	44.349	9.3083	86.5441	1518.48	1980.52	14425.6	11978.3	466.791	57.1547
PL1_Y17	2017	WI	7B	EXP	118311	0.736364	87120	0.195827	23.1685	25.4854	16.28	15.14	92.9975	79.588	42.1531	8.3062	70.2065	1355.01	1899.82	12872.6	10459.3	513.47	53.1681
PL1_Y17	2017	WI	8A	EXP	90346.7	0.928571	83893.3	0.314095	28.3775	31.2152	18.08	16.16	89.3805	76.8711	47.2876	12.932	143.137	2109.62	2326.95	20041.4	17322.4	392.105	67.5832
PL1_Y17	2017	WI	8B	EXP	86044.4	1.0125	87120	0.3405	29.2981	32.2279	17.96	16.5	91.8708	76.8371	45.1593	12.7694	148.404	2083.09	2402.45	19789.4	17013.5	373.433	64.6362
PL1_Y17	2017	WI	9A	EXP	62382.2	1.03448	64533.3	0.449069	28.0139	30.8153	18.46	18.1	98.0498	76.318	47.0201	12.9976	208.355	2120.33	2297.14	20143.1	17575.2	270.739	68.8077
PL1_Y17	2017	WI	9B	EXP	61306.7	1.01754	62382.2	0.455088	27.8999	30.6899	18.54	18.54	100	76.2539	48.4249	13.3676	218.044	2180.68	2287.79	20716.4	18162.6	266.071	71.0552
PL1_Y17	2017	WI	10A	EXP	102178	0.905263	92497.8	0.264884	27.0653	29.7718	17.7	16.4	92.6554	76.9842	46.5678	12.0868	118.292	1971.75	2219.35	18731.7	16068.9	443.452	66.2289
PL1_Y17	2017	WI	10B	EXP	102178	0.915789	93573.3	0.276905	28.2936	31.1229	18.18	16.56	91.0891	76.8716	45.0519	12.2839	120.221	2003.9	2320.07	19037	16273.5	443.452	64.3865
PL1_Y17	2017	WI	11A	GRW	58080	1.03704	60231.1	0.471111	27.3621	30.0983	19.28	18.98	98.444	75.559	49.8131	13.8804	238.987	2264.34	2243.69	21511.2	19015.4	252.067	75.2313
PL1_Y17	2017	WI	11B	GRW	60231.1	0.982143	59155.6	0.404571	24.3678	26.8046	18.98	18.82	99.157	76.2671	49.1411	11.8413	196.598	1931.7	1998.16	18351.1	16091.6	261.403	72.066
PL1_Y17	2017	WI	11C	GRW	59155.6	1.05455	62382.2	0.363673	21.5133	23.6646	19.2	19.2	100	76.117	51.2669	10.9754	185.535	1790.45	1764.09	17009.2	14988.4	256.735	75.6593
HOFS1_Y17	2017	MN	1A	EXP	78515.6	0.972603	76364.4	0.324219	25.4562	28.0019	18.288	15.494	84.7222	76.6551	44.1968	10.9437	139.383	1785.28	2087.41	16960.1	14531.9	340.758	63.7556
HOFS1_Y17	2017	MN	1B	EXP	77440	1.01389	78515.6	0.321889	24.9271	27.4198	18.796	15.367	81.7568	76.064	47.4323	11.792	152.272	1923.65	2044.02	18274.6	15894.5	336.09	70.1554
HOFS1_Y17	2017	MN	2A	EXP	62382.2	0.948276	59155.6	0.402103	25.0841	27.5925	20.066	19.431	96.8354	77.4572	46.2779	10.9036	174.787	1778.73	2056.9	16897.9	14570.3	270.739	64.464
HOFS1_Y17	2017	MN	2B	EXP	53777.8	1.12	60231.1	0.4662	25.0712	27.5783	20.32	18.923	93.125	75.268	50.4314	13.0294	242.282	2125.51	2055.84	20192.4	17903.2	233.396	77.0719
HOFS1_Y17	2017	MN	3A	EXP	67760	1	67760	0.367556	24.9056	27.3961	19.304	16.891	87.5	74.7527	46.7199	12.2406	180.646	1996.83	2042.26	18969.9	16633.6	294.078	72.8874
HOFS1_Y17	2017	MN	3B	EXP	62382.2	0.982759	61306.7	0.387414	24.1677	26.5845	25.3086	14.5288	57.4067	74.9902	43.4072	10.9319	175.241	1783.35	1981.75	16941.8	14689.3	270.739	67.0822
HOFS1_Y17	2017	MN	4A	EXP	70986.7	0.984848	69911.1	0.338424	24.0236	26.426	25.5626	15.748	61.6057	74.8497	51.2821	12.9103	181.869	2106.08	1969.94	20007.8	17729.7	308.082	79.6974
HOFS1_Y17	2017	MN	4B	EXP	75288.9	0.942857	70986.7	0.364	27.4052	30.1457	18.034	16.129	89.4366	75.7062	42.3992	11.7618	156.222	1918.73	2247.22	18227.9	15653.9	326.754	63.6485
HOFS1_Y17	2017	MN	5A	EXP	98951.1	0.880435	87120	0.237174	23.4686	25.8155	17.399	12.954	74.4526	76.9009	43.4911	9.82362	99.2775	1602.55	1924.43	15224.2	12870.3	429.448	62.077
HOFS1_Y17	2017	MN	5B	EXP	100027	0.795699	79591.1	0.201032	20.1086	22.1194	16.637	13.335	80.1527	77.9644	39.8199	7.35182	73.4986	1199.32	1648.9	11393.5	9310.51	434.116	54.2201
HOFS1_Y17	2017	MN	6A	EXP	87120	0.888889	77440	0.249852	21.7671	23.9438	18.669	16.002	85.7143	75.7863	48.6415	10.6821	122.614	1742.6	1784.9	16554.7	14391.7	378.101	72.7788
HOFS1_Y17	2017	MN	6B	EXP	94648.9	0.761364	72062.2	0.218114	20.6442	22.7086	17.2735	15.494	89.698	75.7117	43.93	9.17794	96.9683	1497.22	1692.83	14223.6	12120	410.776	65.9316
HOFS1_Y17	2017	MN	7A	EXP	44097.8	1.12195	49475.6	0.485512	21.41	23.551	20.32	19.939	98.125	75.8194	50.8444	10.9677	248.713	1789.18	1755.62	16997.2	15050.2	191.384	75.9706
HOFS1_Y17	2017	MN	7B	EXP	44097.8	1	44097.8	0.447268	19.7235	21.6959	19.558	19.05	97.4026	75.7596	49.464	9.85377	223.453	1607.47	1617.33	15270.9	13462.2	191.384	74.0908
HOFS1_Y17	2017	MN	8A	EXP	86044.4	0.95	81742.2	0.299025	25.7294	28.3024	17.653	16.383	92.8058	76.357	49.7939	12.6211	146.682	2058.91	2109.81	19559.7	17076.4	373.433	72.747
HOFS1_Y17	2017	MN	8B	EXP	73137.8	1.01471	74213.3	0.316794	23.1696	25.4866	18.034	16.002	88.7324	75.5153	43.7427	10.3397	141.373	1686.74	1899.91	16024	13806.7	317.418	66.1815
HOFS1_Y17	2017	MN	9A	EXP	90346.7	0.77381	69911.1	0.2035	18.3855	20.2241	16.51	11.684	70.7692	76.5114	43.8603	7.89214	87.354	1287.46	1507.61	12230.9	10331.2	392.105	63.6598
HOFS1_Y17	2017	MN	9B	EXP	107556	0.88	94648.9	0.2096	22.5436	24.798	16.51	13.081	79.2308	76.7451	40.2294	8.78763	81.7032	1433.54	1848.58	13618.7	11303.3	466.791	57.8089
HOFS1_Y17	2017	MN	10A	EXP	49475.6	1	49475.6	0.437174	21.6294	23.7924	19.685	19.304	98.0645	75.5193	50.571	11.1573	225.512	1820.12	1773.61	17291.1	15302.8	214.724	76.5001
HOFS1_Y17	2017	MN	10B	EXP	47324.4	1	47324.4	0.437364	20.698	22.7678	20.574	19.177	93.2099	75.8691	44.0222	9.1614	193.587	1494.52	1697.24	14197.9	12295.3	205.388	65.6418
HOFS1_Y17	2017	MN	11A	GRW	58080	1	58080	0.375	21.78	23.958	19.304	18.542	96.0526	76.2831	46.2205	9.94807	171.282	1622.85	1785.96	15417.1	13379	252.067	67.7373
HOFS1_Y17	2017	MN	11B	GRW	54853.3	1	54853.3	0.413647	22.6899	24.9589	19.304	16.637	86.1842	75.6986	47.573	10.9298	199.255	1783.01	1860.57	16938.6	14839.9	238.063	71.4376
HOFS1_Y17	2017	MN	11C	GRW	58080	1	58080	0.402926	23.4019	25.7421	19.4325	18.542	95.4174	75.8058	49.9426	11.7821	202.86	1922.04	1918.96	18259.3	16088.3	252.067	74.665
HOFS2_Y17	2017	MN	1A	EXP	50551.1	1	50551.1	0.432213	21.8488	24.0337	20.32	20.193	99.375	76.067	49.1595	10.7108	211.88	1747.27	1791.6	16599.1	14588.1	219.392	72.7009
HOFS2_Y17	2017	MN	1B	EXP	54853.3	1	54853.3	0.394196	21.623	23.7853	19.431	19.177	98.6928	75.1896	53.0322	11.8543	216.11	1933.82	1773.08	18371.3	16360.2	238.063	81.3034
HOFS2_Y17	2017	MN	2A	EXP	95724.4	0.898876	86044.4	0.235079	22.5028	24.7531	15.875	13.335	84	79.5368	35.3295	6.77855	70.8131	1105.8	1845.23	10505.1	8244.42	415.444	44.6732
HOFS2_Y17	2017	MN	2B	EXP	100027	0.741935	74213.3	0.184	18.4049	20.2454	17.145	12.319	71.8519	76.598	44.0916	7.91281	79.107	1290.83	1509.2	12262.9	10319.6	434.116	63.7594
HOFS2_Y17	2017	MN	3A	EXP	77440	1	77440	0.310556	24.0494	26.4544	18.669	17.145	91.8367	76.9291	48.9207	11.3097	146.044	1844.97	1972.05	17527.2	15219.1	336.09	69.7417
HOFS2_Y17	2017	MN	3B	EXP	77440	0.972222	75288.9	0.341139	26.4178	29.0596	18.288	15.494	84.7222	75.4921	47.9853	12.9449	167.161	2111.74	2166.26	20061.5	17559.1	336.09	72.6692
HOFS2_Y17	2017	MN	4A	EXP	90346.7	0.904762	81742.2	0.244286	22.0704	24.2774	16.891	14.859	87.9699	77.7186	44.3501	9.08733	100.583	1482.44	1809.77	14083.1	11881.3	392.105	61.0623
HOFS2_Y17	2017	MN	4B	EXP	95724.4	0.808989	77440	0.21764	20.8335	22.9169	17.272	14.732	85.2941	76.6131	46.0483	9.34842	97.6597	1525.03	1708.35	14487.8	12364	415.444	66.5461
HOFS2_Y17	2017	MN	5A	EXP	91422.2	0.905882	82817.8	0.274118	25.0604	27.5665	18.161	15.24	83.9161	76.2922	45.3513	11.2269	122.802	1831.46	2054.96	17398.9	14947.2	396.772	66.438
HOFS2_Y17	2017	MN	5B	EXP	95724.4	0.842697	80666.7	0.227079	21.737	23.9107	17.272	11.049	63.9706	76.3501	42.2747	9.0552	94.5965	1477.19	1782.43	14033.3	11835.5	415.444	61.7797
HOFS2_Y17	2017	MN	6A	EXP	60231.1	0.892857	53777.8	0.362857	21.8553	24.0408	19.177	18.161	94.702	76.3513	48.3608	10.4147	172.912	1698.97	1792.13	16140.2	14086.7	261.403	70.6702
HOFS2_Y17	2017	MN	6B	EXP	65608.9	1	65608.9	0.367344	24.101	26.5112	19.05	18.542	97.3333	75.559	51.9853	12.7592	194.474	2081.44	1976.29	19773.7	17512.6	284.743	78.5118
HOFS2_Y17	2017	MN	7A	EXP	57004.4	1.01887	58080	0.400943	22.8556	25.1411	19.177	18.161	94.702	75.7467	49.8642	11.517	202.037	1878.79	1874.16	17848.5	15727	247.399	74.7299
HOFS2_Y17	2017	MN	7B	EXP	53777.8	1	53777.8	0.40768	21.9241	24.1165	19.177	18.542	96.6887	76.7739	50.0398	10.617	197.424	1731.98	1797.78	16453.8	14422.6	233.396	71.8169
HOFS2_Y17	2017	MN	8A	EXP	41946.7	1.15385	48400	0.513846	21.5541	23.7095	20.066	19.812	98.7342	76.142	50.4464	10.8089	257.683	1763.29	1767.44	16751.2	14801.7	182.049	74.3703
HOFS2_Y17	2017	MN	8B	EXP	41946.7	1.10256	46248.9	0.480256	20.1452	22.1597	19.939	19.431	97.4522	75.5116	57.6994	11.8602	282.744	1934.78	1651.9	18380.4	16546.4	182.049	87.3108
HOFS2_Y17	2017	MN	9A	EXP	81742.2	0.986842	80666.7	0.299842	24.5098	26.9607	17.653	13.843	78.4173	77.0727	43.7793	10.2506	125.402	1672.2	2009.8	15885.9	13521.4	354.761	62.0236
HOFS2_Y17	2017	MN	9B	EXP	80666.7	0.88	70986.7	0.272933	22.0166	24.2183	18.034	15.367	85.2113	77.4446	51.1746	10.5888	131.266	1727.37	1805.36	16410	14254.5	350.093	71.3249
HOFS2_Y17	2017	MN	10A	EXP	66684.4	0.903226	60231.1	0.315968	21.0701	23.1771	18.288	16.256	88.8889	76.2242	48.8452	10.1956	152.894	1663.23	1727.75	15800.7	13783.6	289.41	71.7618
HOFS2_Y17	2017	MN	10B	EXP	73137.8	0.897059	65608.9	0.298176	21.808	23.9888	17.907	16.2052	90.4965	78.0224	47.0533	9.39668	128.479	1532.9	1788.25	14562.5	12456.9	317.418	63.9008
HOFS2_Y17	2017	MN	11A	GRW	58080	1.03704	60231.1	0.41037	23.8343	26.2177	17.78	16.383	92.1429	78.0928	50.5527	10.9982	189.363	1794.16	1954.41	17044.5	14838	252.067	68.433
HOFS2_Y17	2017	MN	11B	GRW	52702.2	1.04082	54853.3	0.410612	21.6402	23.8042	19.431	17.653	90.8497	75.2051	51.5106	11.5162	218.514	1878.66	1774.49	17847.3	15844	228.728	78.9214
HOFS2_Y17	2017	MN	11C	GRW	57004.4	1	57004.4	0.398302	22.705	24.9755	18.923	16.383	86.5772	76.6167	51.9744	11.4976	201.696	1875.62	1861.81	17818.4	15709.2	247.399	75.0985
RDG_Y17	2017	ON	1A	EXP	49641	0.816667	40540.2	0.232667	11.5498	12.7048	19	18.75	98.6842	94.4432	29.3333	0.784425	15.8019	127.965	947.085	1215.67	53.1398	215.442	10.0722
RDG_Y17	2017	ON	1B	EXP	48813.7	0.864407	42194.9	0.247797	12.0959	13.3054	19.25	19	98.7013	88.7738	30	1.69738	34.7726	276.897	991.861	2630.52	1426.81	211.851	20.8108
RDG_Y17	2017	ON	1C	EXP	49641	0.2	9928.21	0.0506667	2.51515	2.76666	19.5	18.9167	97.0085	93.52	19.084	0.129597	2.61069	21.1415	206.242	200.844	-220.84	215.442	7.64151
RDG_Y17	2017	ON	2A	EXP	54605.1	0.878788	47986.3	0.257879	14.0815	15.4897	19.6667	19.25	97.8814	91.0102	36.0294	1.9004	34.8026	310.016	1154.68	2945.15	1553.48	236.986	20.0144
RDG_Y17	2017	ON	2B	EXP	55432.5	1.01493	56259.8	0.255224	14.1477	15.5625	19	18.6667	98.2456	91.5408	36.8421	1.83716	33.1423	299.7	1160.11	2847.15	1446.46	240.577	19.2579
RDG_Y17	2017	ON	2C	EXP	56259.8	0.617647	34748.7	0.162647	9.1505	10.0655	19.25	18.75	97.4026	88.2841	32.1168	1.43464	25.5002	234.035	750.341	2223.33	1228.83	244.168	23.2511
RDG_Y17	2017	ON	3A	EXP	71152.1	0.593023	42194.9	0.164419	11.6987	12.8686	19.0833	18.3333	96.0699	88.57	35.7143	1.98983	27.9658	324.605	959.296	3083.75	1815.65	308.8	25.2246
RDG_Y17	2017	ON	3B	EXP	71152.1	0.662791	47159	0.173023	12.311	13.5421	18.5833	18.1667	97.7578	91.3333	36.4286	1.61948	22.7608	264.189	1009.5	2509.8	1191.5	308.8	19.5088
RDG_Y17	2017	ON	3C	EXP	71152.1	0.313953	22338.5	0.0774419	5.51015	6.06117	19.4167	18.8333	96.9957	89.0714	22.4	0.562036	7.89907	91.6861	451.833	871.018	110.385	308.8	15.1268
RDG_Y17	2017	ON	4A	EXP	91008.5	0.372727	33921.4	0.0930909	8.47207	9.31928	18.25	17.25	94.5205	89.9348	35.9375	1.27688	14.0303	208.3	694.71	1978.85	889.161	394.977	22.3515
RDG_Y17	2017	ON	4B	EXP	86871.8	0.428571	37230.8	0.102857	8.93538	9.82892	19.25	19	98.7013	89.1857	28.9256	1.16462	13.4061	189.986	732.702	1804.87	695.144	377.024	19.3293
RDG_Y17	2017	ON	4C	EXP	93490.6	0.318584	29784.6	0.079469	7.42961	8.17257	18.5	18.0833	97.7477	89.2857	26.9231	0.892982	9.55157	145.674	609.228	1383.9	368.926	405.749	17.8248
RDG_Y17	2017	ON	5A	EXP	40540.2	1.18367	47986.3	0.363673	14.7434	16.2177	19.6667	19.1667	97.4576	85.9444	34.0909	2.94356	72.6084	480.189	1208.96	4561.79	3176.89	175.944	29.6089
RDG_Y17	2017	ON	5B	EXP	41367.5	0.62	25647.9	0.1608	6.6519	7.31709	19	18.3333	96.4912	87.2895	29.4574	1.03775	25.086	169.29	545.456	1608.25	883.264	179.535	23.1363
RDG_Y17	2017	ON	5C	EXP	40540.2	1.04082	42194.9	0.304898	12.3606	13.5967	19.3333	18.0833	93.5345	89.8163	32.6667	1.71332	42.2622	279.497	1013.57	2655.22	1465.71	175.944	20.5563
RDG_Y17	2017	ON	6A	EXP	77770.9	0.43617	33921.4	0.114468	8.90229	9.79252	19.5	19.25	98.7179	89.475	30.7692	1.20124	15.4459	195.961	729.988	1861.63	794.112	337.526	20.0113
RDG_Y17	2017	ON	6B	EXP	76943.6	0.526882	40540.2	0.143656	11.0534	12.1587	19.5833	19.3333	98.7234	81.8718	29.1045	2.42996	31.5811	396.405	906.379	3765.85	2525.53	333.935	32.6024
RDG_Y17	2017	ON	6C	EXP	77770.9	0.446809	34748.7	0.115106	8.95193	9.84712	19.5	19.25	98.7179	84.1538	21.6667	1.28062	16.4666	208.911	734.058	1984.65	913.069	337.526	21.2154
RDG_Y17	2017	ON	7A	EXP	100937	0.401639	40540.2	0.100164	10.1102	11.1212	18.6667	17.4167	93.3036	86.9429	28.4553	1.56517	15.5064	255.329	829.038	2425.63	1158.52	438.066	22.9587
RDG_Y17	2017	ON	7B	EXP	100937	0.254098	25647.9	0.0644262	6.50297	7.15327	19.0833	18.3333	96.0699	88.8462	30.9524	0.935448	9.26766	152.602	533.244	1449.72	478.406	438.066	21.3331
RDG_Y17	2017	ON	7C	EXP	94317.9	0.535088	50468.4	0.129474	12.2117	13.4329	18.25	16.3333	89.4977	92.4146	33.8843	1.30779	13.8658	213.343	1001.36	2026.76	616.063	409.34	15.8822
RDG_Y17	2017	ON	8A	EXP	82735	0.32	26475.2	0.085	7.03248	7.73573	18.8333	17.25	91.5929	90.7447	34.8148	0.944175	11.412	154.025	576.663	1463.24	527.507	359.07	19.9109
RDG_Y17	2017	ON	8B	EXP	86044.4	0.557692	47986.3	0.14	12.0462	13.2508	18.5	16.8333	90.991	89.0595	33.871	1.85996	21.6163	303.419	987.79	2882.48	1521.26	373.433	22.8981
RDG_Y17	2017	ON	8C	EXP	86871.8	0.628571	54605.1	0.167238	14.5283	15.9811	18.8333	18	95.5752	87.9186	32.5758	2.3824	27.4243	388.646	1191.32	3692.13	2123.79	377.024	24.3191
RDG_Y17	2017	ON	9A	EXP	107556	0.369231	39712.8	0.0876923	9.43179	10.375	19.3333	18.5833	96.1207	89.9756	34.7458	1.36881	12.7265	223.297	773.407	2121.32	881.121	466.791	21.5226
RDG_Y17	2017	ON	9B	EXP	107556	0.361538	38885.5	0.0806154	8.67063	9.5377	17.8333	16.9167	94.8598	88.8281	29.6296	1.19589	11.1188	195.088	710.992	1853.34	675.556	466.791	20.4545
RDG_Y17	2017	ON	9C	EXP	106728	0.418605	44676.9	0.0953488	10.1764	11.1941	17.8333	17.5	98.1308	89.2619	33.0709	1.50576	14.1084	245.638	834.466	2333.56	1035.9	463.2	21.9436
RDG_Y17	2017	ON	10A	EXP	64533.3	0.871795	56259.8	0.243077	15.6866	17.2552	19.3333	19.0833	98.7069	87.7021	35.0746	2.81929	43.6873	459.917	1286.3	4369.21	2802.84	280.075	26.6538
RDG_Y17	2017	ON	10B	EXP	64533.3	0.705128	45504.3	0.191026	12.3275	13.5603	19.5	19	97.4359	86.6136	31.4286	2.16099	33.4863	352.526	1010.86	3349	2058.07	280.075	25.997
RDG_Y17	2017	ON	10C	EXP	63706	0.766234	48813.7	0.204156	13.0059	14.3065	19.3333	19	98.2759	89.9222	34.0909	1.8618	29.225	303.72	1066.49	2885.34	1542.37	276.484	21.2295
PL2_Y17	2017	WI	1A	EXP	47324.4	1.06818	50551.1	0.425	20.1129	22.1242	18.8	18.56	98.7234	78.6947	51.3057	9.16047	193.567	1494.37	1649.26	14196.5	12341.8	205.388	67.5445
PL2_Y17	2017	WI	1B	EXP	49475.6	1.19565	59155.6	0.479522	23.7246	26.0971	18.34	18.26	99.5638	78.3184	49.1463	10.5335	212.902	1718.35	1945.42	16324.3	14164.1	214.724	65.8444
PL2_Y17	2017	WI	2A	EXP	64533.3	1.03333	66684.4	0.418633	27.0158	29.7174	17.78	17.24	96.9629	77.9506	46.8711	11.6335	180.271	1897.79	2215.3	18029	15533.7	280.075	63.8614
PL2_Y17	2017	WI	2B	EXP	62382.2	0.948276	59155.6	0.395828	24.6926	27.1619	17.82	17.24	96.7452	79.2465	48.106	10.2718	164.659	1675.66	2024.79	15918.8	13623.2	270.739	61.6916
PL2_Y17	2017	WI	3A	EXP	76364.4	0.985915	75288.9	0.364873	27.8633	30.6497	16.96	15.84	93.3962	78.4783	45.7731	11.4369	149.768	1865.73	2284.79	17724.4	15108.2	331.422	60.8728
PL2_Y17	2017	WI	3B	EXP	75288.9	1.01429	76364.4	0.384714	28.9647	31.8612	17.06	16.58	97.1864	78.2059	47.5058	12.4952	165.964	2038.38	2375.11	19364.6	16662.7	326.754	63.9768
PL2_Y17	2017	WI	4A	EXP	88195.6	0.97561	86044.4	0.302073	26.6415	29.3057	17.24	16.72	96.9838	78.8767	48.0739	11.2725	127.812	1838.9	2184.6	17469.6	14902.2	382.769	62.749
PL2_Y17	2017	WI	4B	EXP	73137.8	0.970588	70986.7	0.355176	25.9768	28.5745	18.62	18.12	97.3147	78.6582	47.3421	10.9359	149.524	1783.99	2130.1	16947.9	14500.4	317.418	62.4329
PL2_Y17	2017	WI	5A	EXP	39795.6	1.16216	46248.9	0.474595	18.8868	20.7754	19	18.74	98.6316	79.9141	45.5408	7.19844	180.886	1174.3	1548.71	11155.8	9434.4	172.713	56.5234
PL2_Y17	2017	WI	5B	EXP	39795.6	1.21622	48400	0.529135	21.0572	23.1629	16.96	16.28	95.9906	79.5234	46.4107	8.33808	209.523	1360.21	1726.69	12922	11022.6	172.713	58.7235
PL2_Y17	2017	WI	6A	EXP	73137.8	0.955882	69911.1	0.350971	25.6692	28.2361	16.62	15.56	93.6221	79.0834	46.3117	10.3606	141.658	1690.14	2104.88	16056.3	13634	317.418	59.8573
PL2_Y17	2017	WI	6B	EXP	67760	0.968254	65608.9	0.381048	25.8198	28.4018	18.3	18.02	98.4699	78.4224	45.8561	10.6449	157.097	1736.53	2117.22	16497	14085.7	294.078	61.1415
PL2_Y17	2017	WI	7A	EXP	66684.4	0.983871	65608.9	0.356871	23.7977	26.1775	17.98	17.12	95.2169	79.0127	49.1867	10.236	153.498	1669.81	1951.41	15863.2	13622.4	289.41	63.7881
PL2_Y17	2017	WI	7B	EXP	68835.6	0.9375	64533.3	0.363906	25.0497	27.5547	17.52	17.12	97.7169	80.2108	45.399	9.37706	136.224	1529.7	2054.07	14532.1	12179.3	298.746	55.5151
PL2_Y17	2017	WI	8A	EXP	89271.1	0.987952	88195.6	0.289687	25.8607	28.4467	16.42	15.18	92.4482	78.897	47.6319	10.8311	121.328	1766.9	2120.57	16785.5	14277.5	387.437	62.1124
PL2_Y17	2017	WI	8B	EXP	89271.1	0.963855	86044.4	0.308675	27.5557	30.3113	17.5	16.5	94.2857	79.3086	46.4351	11.0315	123.573	1799.6	2259.57	17096.2	14449.2	387.437	59.3706
PL2_Y17	2017	WI	9A	EXP	44097.8	1.04878	46248.9	0.457854	20.1903	22.2094	17.54	17.46	99.5439	79.8439	48.0998	8.15609	184.955	1330.52	1655.61	12639.9	10793	191.384	59.9081
PL2_Y17	2017	WI	9B	EXP	48400	1.08889	52702.2	0.466533	22.5802	24.8382	17.74	17.24	97.1815	78.6294	48.8317	9.81827	202.857	1601.68	1851.58	15215.9	13154.3	210.056	64.4843
PL2_Y17	2017	WI	10A	EXP	105404	0.938776	98951.1	0.253816	26.7534	29.4287	15.84	14.22	89.7727	79.1337	46.4513	10.8047	102.507	1762.59	2193.78	16744.6	14093.3	457.455	59.8934
PL2_Y17	2017	WI	10B	EXP	106480	0.858586	91422.2	0.240828	25.6434	28.2077	16.76	15.8	94.2721	79.1014	48.1724	10.7567	101.021	1754.76	2102.76	16670.3	14105.4	462.123	62.2086
PL2_Y17	2017	WI	11A	GRW	54853.3	0.980392	53777.8	0.391059	21.4509	23.596	18.64	18.1	97.103	80.2301	43.1778	7.62954	139.09	1244.62	1758.97	11823.9	9826.89	238.063	52.7473
PL2_Y17	2017	WI	11B	GRW	61306.7	1	61306.7	0.420526	25.7811	28.3592	18.08	17.54	97.0133	80.0283	45.4171	9.7437	158.934	1589.51	2114.05	15100.3	12720.2	266.071	56.0492
PL2_Y17	2017	WI	11C	GRW	55928.9	1	55928.9	0.415423	23.2342	25.5576	17.84	17.56	98.4305	78.3327	44.7521	9.38716	167.841	1531.35	1905.2	14547.8	12399.9	242.731	59.9176
